# Supplementary material for: 13C NMR Spectroscopic Studies of Intra- and Intermolecular Interactions of Amino Acid Derivatives and Peptide Derivatives in Solutions
Source: MDPI journal article supplement (doi:10.3390/org3010003), 2022-02-09
Supplement: s1 [file s1]

## Supplementary Material

### <sup>13</sup>C NMR Spectroscopic Studies of Intra- and Intermolecular Interactions of Amino Acid Derivatives and Peptide Derivatives in Solutions

Yoshikazu Hiraga <sup>1\*</sup>, Saori Chaki <sup>1</sup>, Yuri Uyama <sup>1</sup>, Ryosuke Hoshide <sup>1</sup>, Takumi Karaki <sup>1</sup>, Daisuke Nagata <sup>1</sup>, Kanji Yoshimoto <sup>1</sup> and Satomi Niwayama <sup>2\*</sup>

<sup>1</sup> Graduate School of Science and Technology, Hiroshima Institute of Technology, 2-1-1 Miyake, Sacki-ku, Hiroshima, Hiroshima 731-5193, Japan; y.hiraga.65@it-hiroshima.ac.jp

<sup>2</sup> Graduate School of Engineering, Muroran Institute of Technology, 27-1, Mizumoto-cho, Muroran, Hokkaido 050-8585, Japan; niwayama@mmm.muroran-it.ac.jp

\*Correspondence: y.hiraga.65@it-hiroshima.ac.jp (YH); Tel.: +81-82-921-9468;  
niwayama@mmm.muroran-it.ac.jp (SN); Tel.: +81-143-46-5746

#### Index

- S3    **Table S1.** B3LYP/6-31+G(d) Optimized cartesian coordinates, energies, and calculated frequencies of carbonyl groups in the gas phase for *N*-Boc-L-proline-L-alanine-OMe **6**
- S6    **Table S2.** B3LYP/6-31+G(d) Optimized cartesian coordinates, energies, and calculated frequencies of carbonyl groups in chloroform for *N*-Boc-L-proline-L-alanine-OMe **6**
- S9    **Table S3.** B3LYP/6-31+G(d) Optimized cartesian coordinates, energies, and calculated frequencies of carbonyl groups in acetonitrile for *N*-Boc-L-proline-L-alanine-OMe **6**
- S12   **Table S4.** B3LYP/6-31+G(d) Optimized cartesian coordinates, energies, and calculated frequencies of carbonyl groups in the gas phase for *N*-Boc-L-proline-L-serine-OMe **7**
- S15   **Table S5.** B3LYP/6-31+G(d) Optimized cartesian coordinates, energies, and calculated frequencies of carbonyl groups in chloroform for *N*-Boc-L-proline-L-serine-OMe **7**
- S18   **Table S6.** B3LYP/6-31+G(d) Optimized cartesian coordinates, energies, and calculated frequencies of carbonyl groups in acetonitrile for *N*-Boc-L-proline-L-serine-OMe **7**
- S21   **Table S7.** B3LYP/6-31+G(d) Optimized cartesian coordinates, energies, and calculated frequencies of carbonyl groups in the gas phase for *N*-Boc-L-alanine-L-proline-OMe **9**
- S24   **Table S8.** B3LYP/6-31+G(d) Optimized cartesian coordinates, energies, and calculated frequencies of carbonyl groups in chloroform for *N*-Boc-L-alanine-L-proline-OMe **9**
- S27   **Table S9.** B3LYP/6-31+G(d) Optimized cartesian coordinates, energies, and calculated frequencies of carbonyl groups in acetonitrile for *N*-Boc-L-alanine-L-proline-OMe **9**
- S30   **Table S10.** B3LYP/6-31+G(d) Optimized cartesian coordinates, energies, and calculated frequencies of carbonyl groups in the gas phase for *N*-Boc-L-serine-L-proline-OMe **10**
- S33   **Table S11.** B3LYP/6-31+G(d) Optimized cartesian coordinates, energies, and calculated frequencies of carbonyl groups in chloroform for *N*-Boc-L-serine-L-proline-OMe **10**
- S36   **Table S12.** B3LYP/6-31+G(d) Optimized cartesian coordinates, energies, and calculated frequencies of carbonyl groups in acetonitrile for *N*-Boc-L-serine-L-proline-OMe **10**

- S39 **Table S13.**  $^{13}\text{C}$  NMR chemical shifts of carbonyl carbons in **1a**, **1b**, **2**, and **3a**
- S40 **Table S14.**  $^{13}\text{C}$  NMR chemical shifts of carbonyl carbons in **3b**, **4a**, **4b**, and **5**
- S41 **Table S15.**  $^{13}\text{C}$  NMR chemical shifts of carbonyl carbons in **6** and **7**
- S42 **Table S16.**  $^{13}\text{C}$  NMR chemical shifts of carbonyl carbons in **8** and **9**
- S43 **Table S17.**  $^{13}\text{C}$  NMR chemical shifts of carbonyl carbons in **10**

**Table S1.** B3LYP/6-31+G(d) Optimized cartesian coordinates, energies, and calculated frequencies of carbonyl groups in the gas phase for *N*-Boc-L-proline-L-alanine-OMe **6**

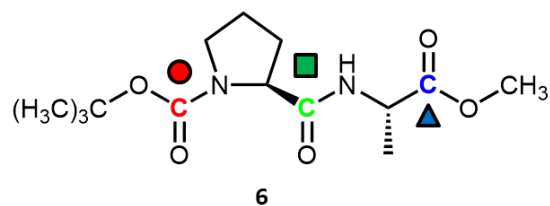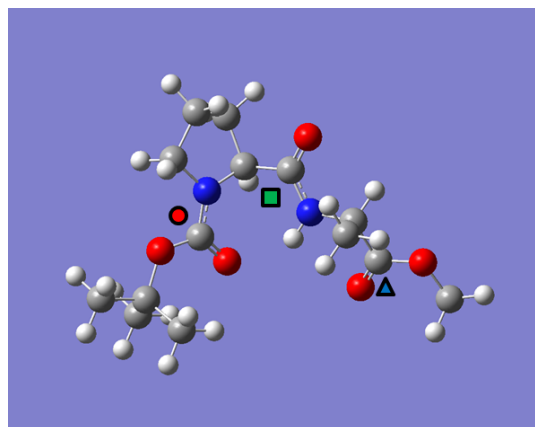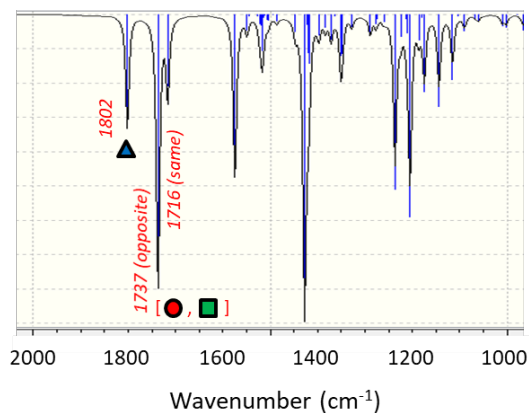

Zero-point correction = 0.384068 (Hartree/Particle)  
 Thermal correction to Energy = 0.407394  
 Thermal correction to Enthalpy = 0.408338  
 Thermal correction to Gibbs Free Energy = 0.329378  
 Sum of electronic and zero-point Energies = -1033.287776  
 Sum of electronic and thermal Energies = -1033.264451  
 Sum of electronic and thermal Enthalpies = -1033.263507  
 Sum of electronic and thermal Free Energies = -1033.342466

| Center<br>Number | Atomic<br>Number | Atomic<br>Type | Coordinates (Angstroms) |           |           |
|------------------|------------------|----------------|-------------------------|-----------|-----------|
|                  |                  |                | X                       | Y         | Z         |
| 1                | 7                | 0              | -1.470426               | 1.191143  | -0.171377 |
| 2                | 6                | 0              | -0.387335               | 1.908191  | -0.876161 |
| 3                | 6                | 0              | -0.908407               | 3.351692  | -0.933320 |
| 4                | 6                | 0              | -1.775370               | 3.479359  | 0.331506  |
| 5                | 6                | 0              | -2.446569               | 2.103291  | 0.455176  |
| 6                | 6                | 0              | -1.669510               | -0.139603 | -0.374097 |
| 7                | 8                | 0              | -0.885173               | -0.857294 | -0.997075 |
| 8                | 8                | 0              | -2.823455               | -0.552196 | 0.198358  |
| 9                | 6                | 0              | -3.241598               | -1.969487 | 0.161184  |
| 10               | 6                | 0              | -4.559908               | -1.943104 | 0.940157  |
| 11               | 6                | 0              | -3.476584               | -2.411156 | -1.287292 |
| 12               | 6                | 0              | -2.207391               | -2.844423 | 0.878020  |
| 13               | 6                | 0              | 0.959696                | 1.796932  | -0.115667 |
| 14               | 8                | 0              | 1.462535                | 2.757099  | 0.471892  |

|    |   |   |           |           |           |
|----|---|---|-----------|-----------|-----------|
| 15 | 7 | 0 | 1.536967  | 0.570468  | -0.164533 |
| 16 | 1 | 0 | 1.041208  | -0.195117 | -0.622408 |
| 17 | 6 | 0 | 2.787157  | 0.294133  | 0.522787  |
| 18 | 6 | 0 | 2.578961  | -0.069004 | 2.009096  |
| 19 | 1 | 0 | 3.404146  | 1.196623  | 0.472288  |
| 20 | 6 | 0 | 3.509657  | -0.832165 | -0.206066 |
| 21 | 8 | 0 | 2.993122  | -1.605383 | -0.986066 |
| 22 | 8 | 0 | 4.806925  | -0.886605 | 0.157083  |
| 23 | 6 | 0 | 5.583695  | -1.950446 | -0.428471 |
| 24 | 1 | 0 | -0.259858 | 1.466291  | -1.870505 |
| 25 | 1 | 0 | -0.090634 | 4.074213  | -0.958904 |
| 26 | 1 | 0 | -1.521193 | 3.477016  | -1.834543 |
| 27 | 1 | 0 | -1.132860 | 3.670836  | 1.197023  |
| 28 | 1 | 0 | -2.511070 | 4.287320  | 0.266101  |
| 29 | 1 | 0 | -2.640199 | 1.808357  | 1.490581  |
| 30 | 1 | 0 | -3.398568 | 2.062149  | -0.090156 |
| 31 | 1 | 0 | -4.400065 | -1.584178 | 1.962651  |
| 32 | 1 | 0 | -5.286924 | -1.284994 | 0.452165  |
| 33 | 1 | 0 | -4.984568 | -2.951784 | 0.989385  |
| 34 | 1 | 0 | -4.185756 | -1.737310 | -1.782001 |
| 35 | 1 | 0 | -2.544303 | -2.424026 | -1.854881 |
| 36 | 1 | 0 | -3.906844 | -3.419730 | -1.294323 |
| 37 | 1 | 0 | -2.596907 | -3.865324 | 0.969108  |
| 38 | 1 | 0 | -2.018787 | -2.463355 | 1.888486  |
| 39 | 1 | 0 | -1.264086 | -2.879355 | 0.329558  |
| 40 | 1 | 0 | 2.070260  | 0.760533  | 2.508423  |
| 41 | 1 | 0 | 1.963437  | -0.970567 | 2.105139  |
| 42 | 1 | 0 | 3.540287  | -0.239779 | 2.504127  |
| 43 | 1 | 0 | 5.602482  | -1.850081 | -1.516737 |
| 44 | 1 | 0 | 6.585039  | -1.837466 | -0.012632 |
| 45 | 1 | 0 | 5.159353  | -2.921793 | -0.161231 |

---

|                |           |       |       |           |       |       |           |       |       |       |
|----------------|-----------|-------|-------|-----------|-------|-------|-----------|-------|-------|-------|
| Frequencies -- | 1716.3783 |       |       | 1736.7926 |       |       | 1801.5732 |       |       |       |
| Red. masses -- | 10.8151   |       |       | 8.6924    |       |       | 11.0425   |       |       |       |
| Frc consts --  | 18.7719   |       |       | 15.4485   |       |       | 21.1165   |       |       |       |
| IR Inten --    | 139.5033  |       |       | 474.8374  |       |       | 195.4426  |       |       |       |
| Atom           | AN        | X     | Y     | Z         | X     | Y     | Z         | X     | Y     | Z     |
| 1              | 7         | 0.04  | -0.13 | -0.04     | 0.01  | -0.07 | -0.02     | 0.00  | -0.01 | 0.00  |
| 2              | 6         | -0.02 | 0.03  | 0.03      | -0.01 | -0.04 | -0.02     | 0.00  | 0.01  | 0.00  |
| 3              | 6         | 0.01  | -0.01 | -0.01     | 0.01  | 0.02  | 0.00      | 0.00  | 0.00  | 0.00  |
| 4              | 6         | 0.00  | 0.00  | 0.00      | 0.00  | 0.00  | 0.01      | 0.00  | 0.00  | 0.00  |
| 5              | 6         | -0.01 | -0.02 | -0.01     | -0.01 | 0.00  | 0.00      | 0.00  | 0.00  | 0.00  |
| 6              | 6         | -0.37 | 0.45  | 0.32      | -0.20 | 0.23  | 0.17      | -0.01 | 0.02  | 0.01  |
| 7              | 8         | 0.23  | -0.22 | -0.19     | 0.12  | -0.11 | -0.09     | 0.01  | -0.01 | -0.01 |
| 8              | 8         | 0.04  | -0.03 | -0.03     | 0.03  | -0.01 | -0.02     | 0.00  | 0.00  | 0.00  |
| 9              | 6         | -0.02 | 0.04  | 0.02      | -0.01 | 0.02  | 0.01      | 0.00  | 0.00  | 0.00  |
| 10             | 6         | 0.00  | -0.01 | 0.00      | 0.00  | -0.01 | 0.00      | 0.00  | 0.00  | 0.00  |
| 11             | 6         | 0.00  | 0.00  | 0.01      | 0.00  | 0.00  | 0.00      | 0.00  | 0.00  | 0.00  |
| 12             | 6         | 0.00  | 0.00  | 0.00      | 0.00  | 0.00  | 0.00      | 0.00  | 0.00  | 0.00  |
| 13             | 6         | -0.15 | -0.30 | -0.19     | 0.21  | 0.48  | 0.27      | -0.03 | -0.05 | -0.03 |

|    |   |       |       |       |       |       |       |       |       |       |
|----|---|-------|-------|-------|-------|-------|-------|-------|-------|-------|
| 14 | 8 | 0.10  | 0.17  | 0.11  | -0.14 | -0.27 | -0.16 | 0.01  | 0.02  | 0.01  |
| 15 | 7 | 0.02  | 0.05  | 0.02  | -0.02 | -0.06 | -0.03 | 0.01  | 0.01  | 0.01  |
| 16 | 1 | 0.01  | 0.03  | -0.05 | 0.33  | -0.34 | 0.05  | -0.13 | 0.10  | -0.01 |
| 17 | 6 | -0.01 | -0.01 | -0.01 | 0.02  | -0.01 | 0.01  | 0.01  | -0.05 | -0.03 |
| 18 | 6 | 0.01  | 0.00  | 0.00  | -0.01 | 0.00  | 0.00  | 0.00  | 0.00  | -0.01 |
| 19 | 1 | -0.01 | -0.02 | 0.00  | -0.08 | 0.08  | -0.05 | 0.12  | -0.12 | -0.12 |
| 20 | 6 | -0.02 | -0.04 | -0.04 | 0.01  | 0.02  | 0.02  | 0.29  | 0.50  | 0.49  |
| 21 | 8 | 0.02  | 0.02  | 0.03  | -0.01 | -0.02 | -0.02 | -0.20 | -0.31 | -0.31 |
| 22 | 8 | 0.00  | 0.00  | 0.00  | -0.01 | 0.00  | 0.00  | -0.03 | -0.03 | -0.03 |
| 23 | 6 | 0.00  | 0.00  | 0.00  | 0.00  | 0.00  | 0.00  | -0.01 | 0.02  | 0.02  |
| 24 | 1 | 0.17  | 0.02  | 0.07  | -0.19 | 0.11  | -0.08 | 0.01  | 0.00  | 0.01  |
| 25 | 1 | -0.07 | 0.06  | -0.05 | 0.05  | 0.00  | 0.07  | 0.00  | 0.00  | 0.00  |
| 26 | 1 | 0.02  | 0.09  | 0.00  | -0.03 | -0.12 | 0.01  | 0.00  | 0.01  | 0.00  |
| 27 | 1 | -0.04 | 0.02  | 0.02  | 0.05  | -0.03 | -0.02 | 0.00  | 0.00  | 0.00  |
| 28 | 1 | 0.02  | 0.03  | 0.03  | -0.01 | -0.01 | -0.05 | 0.00  | 0.00  | 0.00  |
| 29 | 1 | -0.07 | 0.07  | 0.00  | 0.00  | 0.02  | 0.01  | 0.00  | 0.00  | 0.00  |
| 30 | 1 | -0.06 | 0.09  | 0.10  | -0.01 | 0.02  | 0.01  | 0.00  | 0.00  | 0.00  |
| 31 | 1 | 0.02  | 0.00  | -0.01 | 0.01  | 0.00  | 0.00  | 0.00  | 0.00  | 0.00  |
| 32 | 1 | 0.02  | 0.00  | -0.01 | 0.01  | 0.00  | -0.01 | 0.00  | 0.00  | 0.00  |
| 33 | 1 | -0.04 | 0.02  | 0.03  | -0.02 | 0.01  | 0.01  | 0.00  | 0.00  | 0.00  |
| 34 | 1 | 0.01  | 0.03  | 0.02  | 0.01  | 0.02  | 0.01  | 0.00  | 0.00  | 0.00  |
| 35 | 1 | -0.05 | -0.12 | -0.07 | -0.03 | -0.06 | -0.04 | 0.00  | 0.00  | 0.00  |
| 36 | 1 | 0.09  | -0.04 | -0.09 | 0.05  | -0.02 | -0.04 | 0.00  | 0.00  | 0.00  |
| 37 | 1 | 0.11  | -0.05 | -0.05 | 0.06  | -0.02 | -0.03 | 0.00  | 0.00  | 0.00  |
| 38 | 1 | 0.00  | 0.04  | -0.01 | 0.00  | 0.02  | 0.00  | 0.00  | 0.00  | 0.00  |
| 39 | 1 | 0.01  | -0.14 | 0.04  | 0.01  | -0.08 | 0.02  | 0.00  | 0.00  | 0.00  |
| 40 | 1 | 0.00  | -0.02 | 0.02  | 0.00  | 0.03  | -0.04 | -0.03 | -0.06 | 0.04  |
| 41 | 1 | -0.01 | 0.01  | -0.01 | 0.02  | -0.02 | 0.01  | -0.02 | 0.03  | 0.06  |
| 42 | 1 | -0.01 | 0.01  | 0.04  | 0.02  | -0.02 | -0.06 | 0.00  | -0.01 | -0.01 |
| 43 | 1 | -0.01 | 0.01  | 0.00  | 0.01  | 0.00  | 0.00  | 0.13  | -0.07 | 0.03  |
| 44 | 1 | 0.00  | 0.01  | 0.01  | 0.00  | -0.01 | 0.00  | 0.07  | -0.18 | -0.12 |
| 45 | 1 | -0.01 | 0.00  | 0.00  | 0.01  | 0.00  | 0.00  | 0.14  | -0.03 | -0.02 |

**Table S2.** B3LYP/6-31+G(d) Optimized cartesian coordinates, energies, and calculated frequencies of carbonyl groups in chloroform for *N*-Boc-L-proline-L-alanine-OMe **6**

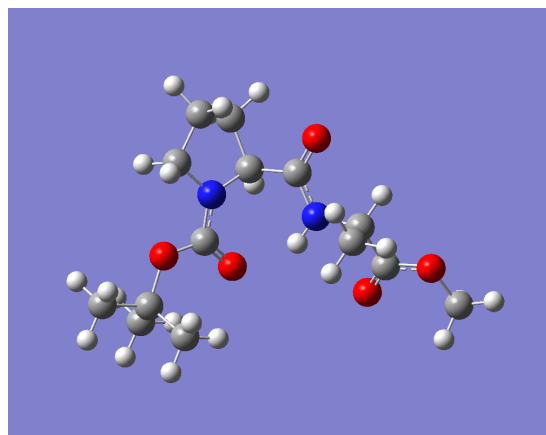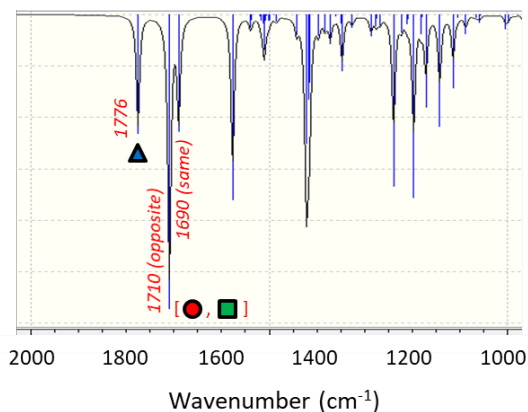

Zero-point correction = 0.383573 (Hartree/Particle)  
 Thermal correction to Energy = 0.406921  
 Thermal correction to Enthalpy = 0.407865  
 Thermal correction to Gibbs Free Energy = 0.328702  
 Sum of electronic and zero-point Energies = -1033.298307  
 Sum of electronic and thermal Energies = -1033.274960  
 Sum of electronic and thermal Enthalpies = -1033.274016  
 Sum of electronic and thermal Free Energies = -1033.353179

| Center Number | Atomic Number | Atomic Type | Coordinates (Angstroms) |           |           |
|---------------|---------------|-------------|-------------------------|-----------|-----------|
|               |               |             | X                       | Y         | Z         |
| 1             | 7             | 0           | -1.453357               | 1.193111  | -0.160987 |
| 2             | 6             | 0           | -0.377630               | 1.924913  | -0.864034 |
| 3             | 6             | 0           | -0.914037               | 3.362582  | -0.915250 |
| 4             | 6             | 0           | -1.781531               | 3.478617  | 0.349740  |
| 5             | 6             | 0           | -2.440793               | 2.097373  | 0.465864  |
| 6             | 6             | 0           | -1.655486               | -0.133929 | -0.376639 |
| 7             | 8             | 0           | -0.863852               | -0.849698 | -1.000742 |
| 8             | 8             | 0           | -2.810729               | -0.549910 | 0.181541  |
| 9             | 6             | 0           | -3.236564               | -1.969524 | 0.149182  |
| 10            | 6             | 0           | -4.558639               | -1.932038 | 0.920708  |
| 11            | 6             | 0           | -3.467408               | -2.415647 | -1.297859 |
| 12            | 6             | 0           | -2.211269               | -2.843393 | 0.878377  |
| 13            | 6             | 0           | 0.978811                | 1.814389  | -0.118202 |
| 14            | 8             | 0           | 1.525151                | 2.790453  | 0.408646  |

|    |   |   |           |           |           |
|----|---|---|-----------|-----------|-----------|
| 15 | 7 | 0 | 1.516125  | 0.572014  | -0.115117 |
| 16 | 1 | 0 | 0.984828  | -0.188335 | -0.541669 |
| 17 | 6 | 0 | 2.766313  | 0.269295  | 0.561636  |
| 18 | 6 | 0 | 2.555006  | -0.143304 | 2.034368  |
| 19 | 1 | 0 | 3.385069  | 1.170712  | 0.536926  |
| 20 | 6 | 0 | 3.490598  | -0.833412 | -0.203737 |
| 21 | 8 | 0 | 2.969436  | -1.579393 | -1.011688 |
| 22 | 8 | 0 | 4.781523  | -0.900808 | 0.157216  |
| 23 | 6 | 0 | 5.571926  | -1.945762 | -0.454496 |
| 24 | 1 | 0 | -0.248040 | 1.492888  | -1.862245 |
| 25 | 1 | 0 | -0.105787 | 4.095194  | -0.946759 |
| 26 | 1 | 0 | -1.530429 | 3.480913  | -1.814110 |
| 27 | 1 | 0 | -1.146944 | 3.672972  | 1.220922  |
| 28 | 1 | 0 | -2.524489 | 4.279213  | 0.285095  |
| 29 | 1 | 0 | -2.635218 | 1.797067  | 1.499067  |
| 30 | 1 | 0 | -3.387729 | 2.051679  | -0.086180 |
| 31 | 1 | 0 | -4.402653 | -1.569887 | 1.942639  |
| 32 | 1 | 0 | -5.280738 | -1.274655 | 0.424536  |
| 33 | 1 | 0 | -4.986209 | -2.939050 | 0.971973  |
| 34 | 1 | 0 | -4.166360 | -1.737277 | -1.800501 |
| 35 | 1 | 0 | -2.532944 | -2.444092 | -1.861363 |
| 36 | 1 | 0 | -3.908457 | -3.419199 | -1.300118 |
| 37 | 1 | 0 | -2.608990 | -3.860154 | 0.975376  |
| 38 | 1 | 0 | -2.025317 | -2.455272 | 1.886443  |
| 39 | 1 | 0 | -1.265101 | -2.891468 | 0.335813  |
| 40 | 1 | 0 | 2.041876  | 0.665992  | 2.562037  |
| 41 | 1 | 0 | 1.942041  | -1.048907 | 2.100427  |
| 42 | 1 | 0 | 3.515027  | -0.327718 | 2.526279  |
| 43 | 1 | 0 | 5.604761  | -1.805869 | -1.537425 |
| 44 | 1 | 0 | 6.566540  | -1.841915 | -0.022336 |
| 45 | 1 | 0 | 5.147878  | -2.924835 | -0.219832 |

|               |    |           |       |       |           |       |       |           |       |       |
|---------------|----|-----------|-------|-------|-----------|-------|-------|-----------|-------|-------|
| Frequencies — |    | 1690.1274 |       |       | 1709.5899 |       |       | 1775.5564 |       |       |
| Red. masses — |    | 10.6197   |       |       | 7.8521    |       |       | 10.9987   |       |       |
| Frc consts —  |    | 17.8732   |       |       | 13.5213   |       |       | 20.4296   |       |       |
| IR Inten —    |    | 289.0707  |       |       | 735.9207  |       |       | 308.7897  |       |       |
| Atom          | AN | X         | Y     | Z     | X         | Y     | Z     | X         | Y     | Z     |
| 1             | 7  | 0.05      | -0.14 | -0.04 | 0.01      | -0.05 | -0.01 | 0.00      | 0.00  | 0.00  |
| 2             | 6  | -0.02     | 0.03  | 0.02  | -0.01     | -0.04 | -0.02 | 0.00      | 0.01  | 0.00  |
| 3             | 6  | 0.01      | -0.01 | -0.01 | 0.01      | 0.02  | 0.00  | 0.00      | 0.00  | 0.00  |
| 4             | 6  | 0.00      | 0.01  | 0.00  | 0.00      | 0.00  | 0.00  | 0.00      | 0.00  | 0.00  |
| 5             | 6  | 0.00      | -0.02 | -0.01 | 0.00      | 0.00  | 0.00  | 0.00      | 0.00  | 0.00  |
| 6             | 6  | -0.40     | 0.48  | 0.34  | -0.15     | 0.16  | 0.12  | -0.01     | 0.01  | 0.01  |
| 7             | 8  | 0.24      | -0.23 | -0.19 | 0.09      | -0.08 | -0.07 | 0.00      | -0.01 | 0.00  |
| 8             | 8  | 0.05      | -0.03 | -0.03 | 0.02      | -0.01 | -0.01 | 0.00      | 0.00  | 0.00  |
| 9             | 6  | -0.02     | 0.04  | 0.02  | -0.01     | 0.01  | 0.01  | 0.00      | 0.00  | 0.00  |
| 10            | 6  | 0.00      | -0.01 | 0.00  | 0.00      | 0.00  | 0.00  | 0.00      | 0.00  | 0.00  |
| 11            | 6  | 0.00      | 0.00  | 0.01  | 0.00      | 0.00  | 0.00  | 0.00      | 0.00  | 0.00  |
| 12            | 6  | 0.00      | 0.00  | 0.00  | 0.00      | 0.00  | 0.00  | 0.00      | 0.00  | 0.00  |
| 13            | 6  | -0.12     | -0.24 | -0.13 | 0.24      | 0.48  | 0.25  | -0.04     | -0.07 | -0.04 |

|    |   |       |       |       |       |       |       |       |       |       |
|----|---|-------|-------|-------|-------|-------|-------|-------|-------|-------|
| 14 | 8 | 0.08  | 0.14  | 0.08  | -0.15 | -0.27 | -0.15 | 0.02  | 0.03  | 0.02  |
| 15 | 7 | 0.01  | 0.05  | 0.02  | -0.04 | -0.05 | -0.03 | 0.00  | 0.02  | 0.01  |
| 16 | 1 | 0.08  | -0.05 | -0.02 | 0.38  | -0.41 | 0.10  | -0.11 | 0.10  | 0.00  |
| 17 | 6 | -0.01 | -0.01 | -0.01 | 0.03  | -0.01 | 0.01  | 0.01  | -0.06 | -0.04 |
| 18 | 6 | 0.01  | 0.00  | 0.00  | -0.01 | 0.00  | 0.00  | 0.00  | 0.00  | -0.01 |
| 19 | 1 | -0.04 | 0.00  | -0.01 | -0.08 | 0.08  | -0.06 | 0.12  | -0.12 | -0.13 |
| 20 | 6 | -0.02 | -0.03 | -0.03 | 0.02  | 0.04  | 0.04  | 0.29  | 0.49  | 0.51  |
| 21 | 8 | 0.01  | 0.02  | 0.02  | -0.02 | -0.03 | -0.03 | -0.20 | -0.30 | -0.32 |
| 22 | 8 | 0.00  | 0.00  | 0.00  | -0.01 | 0.00  | 0.00  | -0.03 | -0.03 | -0.03 |
| 23 | 6 | 0.00  | 0.00  | 0.00  | 0.00  | 0.00  | 0.00  | -0.01 | 0.03  | 0.02  |
| 24 | 1 | 0.14  | 0.03  | 0.06  | -0.19 | 0.10  | -0.08 | 0.02  | -0.01 | 0.01  |
| 25 | 1 | -0.06 | 0.06  | -0.03 | 0.04  | 0.00  | 0.06  | -0.01 | 0.00  | 0.00  |
| 26 | 1 | 0.01  | 0.07  | 0.00  | -0.02 | -0.13 | 0.00  | 0.00  | 0.02  | 0.00  |
| 27 | 1 | -0.02 | 0.02  | 0.01  | 0.04  | -0.02 | -0.01 | 0.00  | 0.00  | 0.00  |
| 28 | 1 | 0.02  | 0.03  | 0.02  | -0.01 | -0.01 | -0.04 | 0.00  | 0.00  | 0.00  |
| 29 | 1 | -0.10 | 0.08  | 0.00  | 0.00  | 0.02  | 0.00  | 0.00  | 0.00  | 0.00  |
| 30 | 1 | -0.08 | 0.10  | 0.13  | -0.01 | 0.02  | 0.01  | 0.00  | 0.00  | 0.00  |
| 31 | 1 | 0.02  | -0.01 | -0.01 | 0.01  | 0.00  | 0.00  | 0.00  | 0.00  | 0.00  |
| 32 | 1 | 0.01  | -0.01 | -0.02 | 0.00  | 0.00  | 0.00  | 0.00  | 0.00  | 0.00  |
| 33 | 1 | -0.05 | 0.02  | 0.04  | -0.02 | 0.01  | 0.01  | 0.00  | 0.00  | 0.00  |
| 34 | 1 | 0.01  | 0.03  | 0.03  | 0.01  | 0.01  | 0.01  | 0.00  | 0.00  | 0.00  |
| 35 | 1 | -0.05 | -0.12 | -0.07 | -0.02 | -0.05 | -0.03 | 0.00  | 0.00  | 0.00  |
| 36 | 1 | 0.10  | -0.04 | -0.09 | 0.04  | -0.02 | -0.03 | 0.00  | 0.00  | 0.00  |
| 37 | 1 | 0.12  | -0.05 | -0.05 | 0.04  | -0.02 | -0.02 | 0.00  | 0.00  | 0.00  |
| 38 | 1 | -0.01 | 0.04  | -0.01 | 0.00  | 0.01  | 0.00  | 0.00  | 0.00  | 0.00  |
| 39 | 1 | 0.01  | -0.14 | 0.04  | 0.00  | -0.06 | 0.02  | 0.00  | 0.00  | 0.00  |
| 40 | 1 | 0.00  | -0.01 | 0.01  | -0.01 | 0.01  | -0.01 | -0.02 | -0.06 | 0.04  |
| 41 | 1 | 0.00  | 0.01  | -0.01 | 0.01  | -0.01 | 0.01  | -0.02 | 0.03  | 0.06  |
| 42 | 1 | -0.01 | 0.00  | 0.03  | 0.03  | 0.00  | -0.06 | 0.00  | 0.00  | -0.01 |
| 43 | 1 | -0.01 | 0.01  | 0.00  | 0.01  | 0.00  | 0.00  | 0.12  | -0.08 | 0.03  |
| 44 | 1 | 0.00  | 0.01  | 0.01  | 0.01  | -0.01 | -0.01 | 0.07  | -0.18 | -0.13 |
| 45 | 1 | -0.01 | 0.00  | 0.00  | 0.01  | 0.00  | 0.00  | 0.15  | -0.03 | -0.03 |



**Table S3.** B3LYP/6-31+G(d) Optimized cartesian coordinates, energies, and calculated frequencies of carbonyl groups in acetonitrile for *N*-Boc-L-proline-L-alanine-OMe **6**

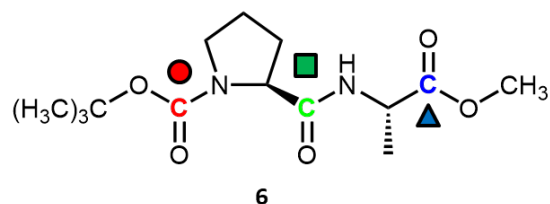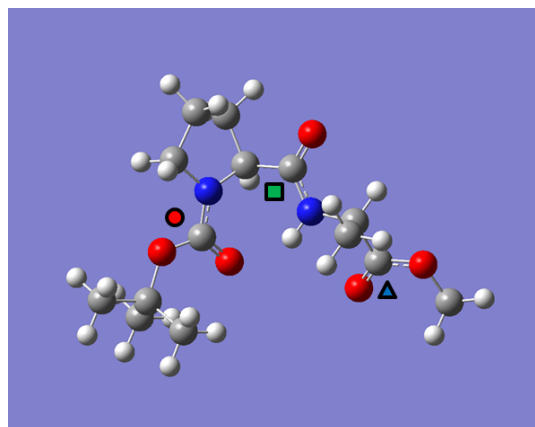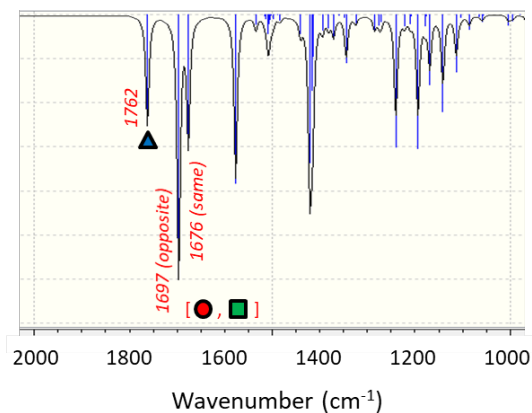

Zero-point correction = 0.383286 (Hartree/Particle)  
 Thermal correction to Energy = 0.406658  
 Thermal correction to Enthalpy = 0.407602  
 Thermal correction to Gibbs Free Energy = 0.328430  
 Sum of electronic and zero-point Energies = -1033.302954  
 Sum of electronic and thermal Energies = -1033.279582  
 Sum of electronic and thermal Enthalpies = -1033.278638  
 Sum of electronic and thermal Free Energies = -1033.357809

| Center<br>Number | Atomic<br>Number | Atomic<br>Type | Coordinates (Angstroms) |           |           |
|------------------|------------------|----------------|-------------------------|-----------|-----------|
|                  |                  |                | X                       | Y         | Z         |
| 1                | 7                | 0              | -1.446722               | 1.191808  | -0.160388 |
| 2                | 6                | 0              | -0.386728               | 1.941985  | -0.868400 |
| 3                | 6                | 0              | -0.944140               | 3.371806  | -0.909326 |
| 4                | 6                | 0              | -1.800495               | 3.471027  | 0.364377  |
| 5                | 6                | 0              | -2.441552               | 2.081616  | 0.478236  |
| 6                | 6                | 0              | -1.638588               | -0.135144 | -0.380205 |
| 7                | 8                | 0              | -0.839551               | -0.842974 | -1.008518 |
| 8                | 8                | 0              | -2.787340               | -0.563343 | 0.177196  |
| 9                | 6                | 0              | -3.201846               | -1.988409 | 0.154880  |
| 10               | 6                | 0              | -4.523683               | -1.955662 | 0.926697  |
| 11               | 6                | 0              | -3.430268               | -2.445777 | -1.288669 |
| 12               | 6                | 0              | -2.168935               | -2.846941 | 0.890745  |
| 13               | 6                | 0              | 0.981342                | 1.845292  | -0.140817 |
| 14               | 8                | 0              | 1.547868                | 2.835414  | 0.340058  |

|    |   |   |           |           |           |
|----|---|---|-----------|-----------|-----------|
| 15 | 7 | 0 | 1.507573  | 0.600466  | -0.104759 |
| 16 | 1 | 0 | 0.962096  | -0.165648 | -0.502575 |
| 17 | 6 | 0 | 2.770204  | 0.300193  | 0.550520  |
| 18 | 6 | 0 | 2.590658  | -0.056543 | 2.041834  |
| 19 | 1 | 0 | 3.406774  | 1.186322  | 0.475749  |
| 20 | 6 | 0 | 3.451558  | -0.843278 | -0.194930 |
| 21 | 8 | 0 | 2.890661  | -1.602345 | -0.965807 |
| 22 | 8 | 0 | 4.746670  | -0.928868 | 0.134147  |
| 23 | 6 | 0 | 5.502193  | -2.011633 | -0.459607 |
| 24 | 1 | 0 | -0.259688 | 1.518162  | -1.870494 |
| 25 | 1 | 0 | -0.147365 | 4.116470  | -0.949298 |
| 26 | 1 | 0 | -1.571841 | 3.482916  | -1.800837 |
| 27 | 1 | 0 | -1.162235 | 3.668070  | 1.232624  |
| 28 | 1 | 0 | -2.553835 | 4.262287  | 0.310318  |
| 29 | 1 | 0 | -2.624350 | 1.773807  | 1.511156  |
| 30 | 1 | 0 | -3.390491 | 2.027462  | -0.068765 |
| 31 | 1 | 0 | -4.369976 | -1.585273 | 1.945989  |
| 32 | 1 | 0 | -5.251459 | -1.308420 | 0.425531  |
| 33 | 1 | 0 | -4.942290 | -2.965846 | 0.985260  |
| 34 | 1 | 0 | -4.131674 | -1.774058 | -1.796568 |
| 35 | 1 | 0 | -2.495739 | -2.475332 | -1.852099 |
| 36 | 1 | 0 | -3.867200 | -3.450915 | -1.282908 |
| 37 | 1 | 0 | -2.557837 | -3.866205 | 0.995218  |
| 38 | 1 | 0 | -1.986411 | -2.449567 | 1.895690  |
| 39 | 1 | 0 | -1.221968 | -2.891329 | 0.349052  |
| 40 | 1 | 0 | 2.108640  | 0.780762  | 2.554924  |
| 41 | 1 | 0 | 1.961518  | -0.945946 | 2.155753  |
| 42 | 1 | 0 | 3.559663  | -0.244533 | 2.514037  |
| 43 | 1 | 0 | 5.512343  | -1.907915 | -1.546850 |
| 44 | 1 | 0 | 6.508233  | -1.913294 | -0.054211 |
| 45 | 1 | 0 | 5.064333  | -2.972157 | -0.179294 |

|               |    |           |       |       |           |       |       |           |       |       |
|---------------|----|-----------|-------|-------|-----------|-------|-------|-----------|-------|-------|
| Frequencies — |    | 1676.2982 |       |       | 1696.5465 |       |       | 1762.3547 |       |       |
| Red. masses — |    | 10.1388   |       |       | 7.4439    |       |       | 10.8888   |       |       |
| Frc consts —  |    | 16.7856   |       |       | 12.6236   |       |       | 19.9259   |       |       |
| IR Inten —    |    | 414.2857  |       |       | 866.7151  |       |       | 364.1131  |       |       |
| Atom          | AN | X         | Y     | Z     | X         | Y     | Z     | X         | Y     | Z     |
| 1             | 7  | 0.05      | -0.15 | -0.04 | 0.00      | -0.03 | -0.01 | 0.00      | 0.00  | 0.00  |
| 2             | 6  | -0.02     | 0.03  | 0.02  | -0.02     | -0.04 | -0.02 | 0.00      | 0.01  | 0.00  |
| 3             | 6  | 0.01      | -0.01 | -0.01 | 0.01      | 0.02  | 0.00  | 0.00      | 0.00  | 0.00  |
| 4             | 6  | 0.00      | 0.01  | 0.00  | 0.00      | 0.00  | 0.00  | 0.00      | 0.00  | 0.00  |
| 5             | 6  | 0.00      | -0.02 | -0.01 | 0.00      | 0.00  | 0.00  | 0.00      | 0.00  | 0.00  |
| 6             | 6  | -0.40     | 0.48  | 0.34  | -0.12     | 0.12  | 0.09  | 0.00      | 0.00  | 0.00  |
| 7             | 8  | 0.24      | -0.23 | -0.19 | 0.07      | -0.06 | -0.05 | 0.00      | 0.00  | 0.00  |
| 8             | 8  | 0.05      | -0.03 | -0.03 | 0.02      | 0.00  | -0.01 | 0.00      | 0.00  | 0.00  |
| 9             | 6  | -0.02     | 0.04  | 0.02  | -0.01     | 0.01  | 0.01  | 0.00      | 0.00  | 0.00  |
| 10            | 6  | 0.01      | -0.01 | 0.00  | 0.00      | 0.00  | 0.00  | 0.00      | 0.00  | 0.00  |
| 11            | 6  | 0.00      | 0.00  | 0.01  | 0.00      | 0.00  | 0.00  | 0.00      | 0.00  | 0.00  |
| 12            | 6  | 0.00      | 0.00  | 0.00  | 0.00      | 0.00  | 0.00  | 0.00      | 0.00  | 0.00  |
| 13            | 6  | -0.09     | -0.19 | -0.09 | 0.26      | 0.48  | 0.23  | -0.04     | -0.08 | -0.04 |

|    |   |       |       |       |       |       |       |       |       |       |
|----|---|-------|-------|-------|-------|-------|-------|-------|-------|-------|
| 14 | 8 | 0.06  | 0.11  | 0.06  | -0.16 | -0.27 | -0.13 | 0.02  | 0.04  | 0.02  |
| 15 | 7 | 0.00  | 0.06  | 0.01  | -0.05 | -0.04 | -0.03 | 0.00  | 0.02  | 0.01  |
| 16 | 1 | 0.16  | -0.13 | 0.01  | 0.41  | -0.43 | 0.12  | -0.12 | 0.11  | -0.01 |
| 17 | 6 | -0.01 | -0.02 | -0.01 | 0.03  | -0.02 | 0.01  | 0.00  | -0.06 | -0.03 |
| 18 | 6 | 0.00  | 0.00  | 0.00  | -0.01 | 0.00  | 0.00  | 0.00  | 0.00  | -0.01 |
| 19 | 1 | -0.06 | 0.01  | -0.01 | -0.07 | 0.07  | -0.06 | 0.11  | -0.12 | -0.13 |
| 20 | 6 | -0.01 | -0.02 | -0.02 | 0.03  | 0.05  | 0.05  | 0.31  | 0.49  | 0.48  |
| 21 | 8 | 0.01  | 0.01  | 0.01  | -0.02 | -0.03 | -0.04 | -0.21 | -0.30 | -0.30 |
| 22 | 8 | 0.00  | 0.00  | 0.00  | -0.01 | 0.00  | 0.00  | -0.03 | -0.03 | -0.03 |
| 23 | 6 | 0.00  | 0.00  | 0.00  | 0.00  | 0.00  | 0.00  | -0.01 | 0.03  | 0.02  |
| 24 | 1 | 0.11  | 0.03  | 0.05  | -0.18 | 0.09  | -0.08 | 0.02  | -0.01 | 0.01  |
| 25 | 1 | -0.06 | 0.06  | -0.02 | 0.04  | 0.00  | 0.06  | -0.01 | 0.00  | -0.01 |
| 26 | 1 | 0.01  | 0.06  | 0.00  | -0.02 | -0.13 | 0.00  | 0.00  | 0.02  | 0.00  |
| 27 | 1 | -0.01 | 0.01  | 0.00  | 0.03  | -0.02 | -0.01 | 0.00  | 0.00  | 0.00  |
| 28 | 1 | 0.02  | 0.03  | 0.02  | -0.01 | -0.01 | -0.04 | 0.00  | 0.00  | 0.01  |
| 29 | 1 | -0.12 | 0.09  | 0.00  | 0.00  | 0.01  | 0.00  | 0.00  | 0.00  | 0.00  |
| 30 | 1 | -0.09 | 0.10  | 0.15  | -0.01 | 0.01  | 0.01  | 0.00  | 0.00  | 0.00  |
| 31 | 1 | 0.02  | -0.02 | -0.01 | 0.00  | 0.00  | 0.00  | 0.00  | 0.00  | 0.00  |
| 32 | 1 | 0.01  | -0.02 | -0.02 | 0.00  | 0.00  | 0.00  | 0.00  | 0.00  | 0.00  |
| 33 | 1 | -0.06 | 0.02  | 0.04  | -0.01 | 0.00  | 0.01  | 0.00  | 0.00  | 0.00  |
| 34 | 1 | 0.02  | 0.04  | 0.02  | 0.01  | 0.01  | 0.00  | 0.00  | 0.00  | 0.00  |
| 35 | 1 | -0.06 | -0.12 | -0.07 | -0.02 | -0.03 | -0.02 | 0.00  | 0.00  | 0.00  |
| 36 | 1 | 0.10  | -0.04 | -0.09 | 0.03  | -0.01 | -0.02 | 0.00  | 0.00  | 0.00  |
| 37 | 1 | 0.12  | -0.05 | -0.05 | 0.03  | -0.01 | -0.02 | 0.00  | 0.00  | 0.00  |
| 38 | 1 | -0.01 | 0.04  | -0.02 | 0.00  | 0.01  | 0.00  | 0.00  | 0.00  | 0.00  |
| 39 | 1 | 0.01  | -0.14 | 0.05  | 0.00  | -0.04 | 0.01  | 0.00  | 0.00  | 0.00  |
| 40 | 1 | 0.01  | -0.01 | 0.02  | -0.01 | 0.01  | -0.01 | -0.02 | -0.06 | 0.05  |
| 41 | 1 | -0.01 | 0.01  | -0.02 | 0.00  | -0.01 | 0.01  | -0.01 | 0.03  | 0.05  |
| 42 | 1 | -0.01 | 0.01  | 0.03  | 0.03  | 0.00  | -0.07 | -0.01 | 0.00  | 0.00  |
| 43 | 1 | -0.01 | 0.00  | 0.00  | 0.01  | -0.01 | 0.00  | 0.12  | -0.10 | 0.02  |
| 44 | 1 | 0.00  | 0.01  | 0.00  | 0.01  | -0.02 | -0.01 | 0.07  | -0.19 | -0.12 |
| 45 | 1 | -0.01 | 0.00  | 0.00  | 0.02  | -0.01 | 0.00  | 0.15  | -0.04 | -0.04 |

**Table S4.** B3LYP/6-31+G(d) Optimized cartesian coordinates, energies, and calculated frequencies of carbonyl groups in the gas phase for *N*-Boc-L-proline-L-serine-OMe **7**

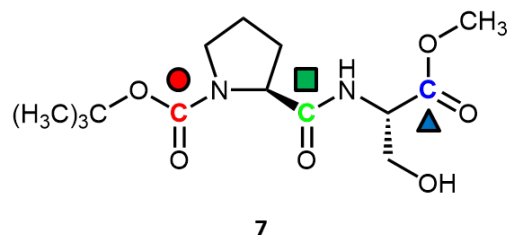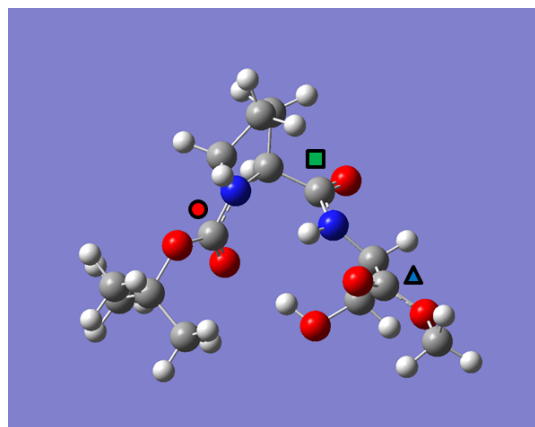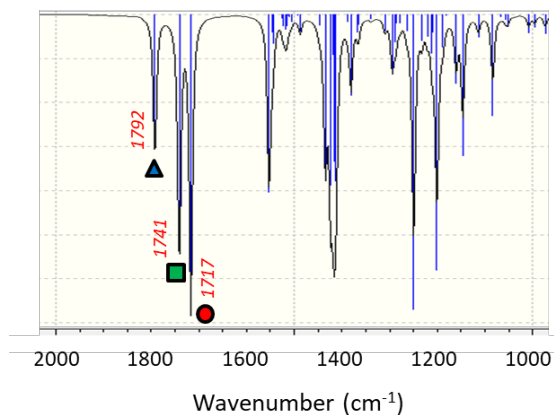

Zero-point correction = 0.389713 (Hartree/Particle)  
 Thermal correction to Energy = 0.413685  
 Thermal correction to Enthalpy = 0.414629  
 Thermal correction to Gibbs Free Energy = 0.335087  
 Sum of electronic and zero-point Energies = -1108.498909  
 Sum of electronic and thermal Energies = -1108.474937  
 Sum of electronic and thermal Enthalpies = -1108.473993  
 Sum of electronic and thermal Free Energies = -1108.553535

| Center<br>Number | Atomic<br>Number | Atomic<br>Type | Coordinates (Angstroms) |           |           |
|------------------|------------------|----------------|-------------------------|-----------|-----------|
|                  |                  |                | X                       | Y         | Z         |
| 1                | 7                | 0              | 1.299835                | 1.330791  | -0.248856 |
| 2                | 6                | 0              | 0.530788                | 2.325203  | 0.518267  |
| 3                | 6                | 0              | 0.692452                | 3.619577  | -0.312937 |
| 4                | 6                | 0              | 0.961423                | 3.114702  | -1.741323 |
| 5                | 6                | 0              | 1.824424                | 1.865685  | -1.520003 |
| 6                | 6                | 0              | 1.712711                | 0.170642  | 0.342792  |
| 7                | 8                | 0              | 1.277672                | -0.222196 | 1.427209  |
| 8                | 8                | 0              | 2.622643                | -0.466982 | -0.418636 |
| 9                | 6                | 0              | 3.160057                | -1.800158 | -0.051128 |
| 10               | 6                | 0              | 4.124308                | -2.088475 | -1.204965 |
| 11               | 6                | 0              | 3.914802                | -1.713455 | 1.279116  |
| 12               | 6                | 0              | 2.028037                | -2.831067 | -0.019149 |
| 13               | 6                | 0              | -0.940178               | 1.949888  | 0.772698  |

|    |   |   |           |           |           |
|----|---|---|-----------|-----------|-----------|
| 14 | 8 | 0 | -1.599267 | 2.593128  | 1.588665  |
| 15 | 7 | 0 | -1.429477 | 0.896724  | 0.073016  |
| 16 | 1 | 0 | -0.814241 | 0.397207  | -0.558074 |
| 17 | 6 | 0 | -2.648409 | 0.205094  | 0.453201  |
| 18 | 6 | 0 | -2.453337 | -0.560975 | 1.792066  |
| 19 | 1 | 0 | -3.458412 | 0.930661  | 0.590377  |
| 20 | 6 | 0 | -3.013447 | -0.744031 | -0.679684 |
| 21 | 8 | 0 | -2.298567 | -0.994458 | -1.630259 |
| 22 | 8 | 0 | -4.226092 | -1.288315 | -0.485249 |
| 23 | 6 | 0 | -4.652658 | -2.256330 | -1.465498 |
| 24 | 8 | 0 | -1.389124 | -1.491101 | 1.726352  |
| 25 | 1 | 0 | -0.536254 | -1.012430 | 1.730434  |
| 26 | 1 | 0 | 0.957039  | 2.437495  | 1.520070  |
| 27 | 1 | 0 | -0.185894 | 4.264413  | -0.228434 |
| 28 | 1 | 0 | 1.557049  | 4.182506  | 0.058001  |
| 29 | 1 | 0 | 0.021015  | 2.839479  | -2.233761 |
| 30 | 1 | 0 | 1.463648  | 3.857898  | -2.368325 |
| 31 | 1 | 0 | 1.730505  | 1.122551  | -2.315879 |
| 32 | 1 | 0 | 2.888329  | 2.120123  | -1.418047 |
| 33 | 1 | 0 | 3.591414  | -2.108256 | -2.161677 |
| 34 | 1 | 0 | 4.906557  | -1.323624 | -1.259225 |
| 35 | 1 | 0 | 4.602640  | -3.062561 | -1.055376 |
| 36 | 1 | 0 | 4.414990  | -2.669647 | 1.472855  |
| 37 | 1 | 0 | 4.683130  | -0.932893 | 1.234658  |
| 38 | 1 | 0 | 3.239157  | -1.498664 | 2.108978  |
| 39 | 1 | 0 | 1.470416  | -2.821575 | -0.962319 |
| 40 | 1 | 0 | 1.332887  | -2.646953 | 0.801782  |
| 41 | 1 | 0 | 2.456412  | -3.831938 | 0.110437  |
| 42 | 1 | 0 | -2.294342 | 0.183557  | 2.581589  |
| 43 | 1 | 0 | -3.361766 | -1.125279 | 2.019960  |
| 44 | 1 | 0 | -5.637479 | -2.585104 | -1.133746 |
| 45 | 1 | 0 | -3.952519 | -3.094901 | -1.494991 |
| 46 | 1 | 0 | -4.710751 | -1.793079 | -2.453792 |

|                |    |           |       |       |           |       |       |           |      |       |
|----------------|----|-----------|-------|-------|-----------|-------|-------|-----------|------|-------|
| Frequencies -- |    | 1716.7591 |       |       | 1741.0289 |       |       | 1792.0968 |      |       |
| Red. masses -- |    | 10.4190   |       |       | 10.2892   |       |       | 10.9351   |      |       |
| Frc consts --  |    | 18.0924   |       |       | 18.3757   |       |       | 20.6916   |      |       |
| IR Inten --    |    | 386.7178  |       |       | 330.8984  |       |       | 190.4276  |      |       |
| Atom           | AN | X         | Y     | Z     | X         | Y     | Z     | X         | Y    | Z     |
| 1              | 7  | 0.01      | 0.10  | -0.10 | 0.01      | 0.01  | -0.02 | 0.00      | 0.00 | 0.00  |
| 2              | 6  | -0.02     | 0.01  | 0.03  | 0.04      | -0.02 | -0.03 | -0.01     | 0.00 | 0.01  |
| 3              | 6  | 0.01      | -0.01 | -0.01 | -0.01     | 0.01  | -0.01 | 0.00      | 0.00 | 0.00  |
| 4              | 6  | 0.00      | 0.00  | 0.01  | 0.00      | -0.01 | 0.00  | 0.00      | 0.00 | 0.00  |
| 5              | 6  | -0.01     | 0.01  | -0.01 | 0.00      | 0.00  | 0.00  | 0.00      | 0.00 | 0.00  |
| 6              | 6  | -0.23     | -0.30 | 0.66  | 0.00      | -0.02 | 0.02  | -0.01     | 0.00 | 0.01  |
| 7              | 8  | 0.14      | 0.14  | -0.37 | 0.00      | 0.01  | -0.01 | 0.00      | 0.00 | -0.01 |
| 8              | 8  | 0.03      | 0.01  | -0.06 | 0.00      | 0.00  | 0.00  | 0.00      | 0.00 | 0.00  |
| 9              | 6  | -0.01     | -0.03 | 0.04  | 0.00      | 0.00  | 0.00  | 0.00      | 0.00 | 0.00  |
| 10             | 6  | 0.00      | 0.01  | -0.01 | 0.00      | 0.00  | 0.00  | 0.00      | 0.00 | 0.00  |
| 11             | 6  | 0.00      | 0.00  | 0.01  | 0.00      | 0.00  | 0.00  | 0.00      | 0.00 | 0.00  |
| 12             | 6  | 0.00      | 0.00  | 0.00  | 0.00      | 0.00  | 0.00  | 0.00      | 0.00 | 0.00  |

|    |   |       |       |       |       |       |       |       |       |       |
|----|---|-------|-------|-------|-------|-------|-------|-------|-------|-------|
| 13 | 6 | -0.01 | -0.04 | -0.02 | -0.36 | 0.41  | 0.50  | 0.05  | -0.04 | -0.06 |
| 14 | 8 | 0.00  | 0.01  | 0.01  | 0.24  | -0.23 | -0.29 | -0.03 | 0.02  | 0.03  |
| 15 | 7 | 0.02  | 0.04  | 0.01  | 0.03  | -0.06 | -0.06 | -0.01 | 0.01  | 0.02  |
| 16 | 1 | -0.11 | -0.15 | 0.02  | -0.20 | -0.24 | -0.13 | 0.14  | 0.12  | 0.07  |
| 17 | 6 | -0.01 | -0.01 | 0.00  | -0.02 | -0.01 | 0.01  | 0.01  | -0.04 | -0.04 |
| 18 | 6 | 0.01  | -0.01 | 0.00  | 0.01  | 0.00  | 0.01  | -0.01 | 0.01  | -0.01 |
| 19 | 1 | 0.03  | 0.02  | -0.02 | 0.03  | 0.08  | 0.00  | -0.06 | -0.08 | -0.14 |
| 20 | 6 | 0.01  | 0.00  | -0.01 | -0.05 | 0.02  | 0.07  | -0.42 | 0.17  | 0.60  |
| 21 | 8 | -0.01 | 0.00  | 0.01  | 0.03  | -0.01 | -0.05 | 0.27  | -0.10 | -0.38 |
| 22 | 8 | 0.00  | 0.00  | 0.00  | 0.01  | 0.00  | 0.00  | 0.04  | 0.00  | -0.04 |
| 23 | 6 | 0.00  | 0.00  | 0.00  | 0.00  | 0.00  | 0.00  | 0.00  | 0.02  | 0.02  |
| 24 | 8 | 0.00  | 0.01  | 0.00  | 0.00  | 0.00  | 0.00  | 0.00  | 0.00  | 0.00  |
| 25 | 1 | 0.00  | -0.09 | -0.05 | 0.01  | -0.02 | 0.04  | 0.00  | 0.01  | 0.01  |
| 26 | 1 | 0.09  | -0.09 | 0.01  | -0.24 | 0.00  | 0.11  | 0.03  | 0.00  | -0.01 |
| 27 | 1 | -0.01 | -0.04 | 0.03  | -0.04 | -0.03 | 0.03  | 0.00  | 0.00  | 0.00  |
| 28 | 1 | 0.00  | 0.00  | 0.00  | 0.02  | -0.07 | 0.05  | 0.00  | 0.01  | -0.01 |
| 29 | 1 | 0.00  | 0.00  | 0.00  | 0.01  | 0.02  | -0.01 | 0.00  | 0.00  | 0.00  |
| 30 | 1 | 0.01  | -0.02 | -0.01 | -0.02 | 0.01  | 0.00  | 0.00  | 0.00  | 0.00  |
| 31 | 1 | -0.04 | -0.05 | 0.05  | 0.00  | -0.01 | 0.01  | 0.01  | 0.00  | 0.00  |
| 32 | 1 | -0.01 | -0.04 | 0.14  | 0.00  | -0.01 | 0.01  | 0.00  | 0.00  | -0.01 |
| 33 | 1 | 0.02  | 0.00  | -0.02 | 0.00  | 0.00  | 0.00  | 0.00  | 0.00  | 0.00  |
| 34 | 1 | 0.01  | 0.00  | -0.02 | 0.00  | 0.00  | 0.00  | 0.00  | 0.00  | 0.00  |
| 35 | 1 | -0.03 | 0.00  | 0.06  | 0.00  | 0.00  | 0.00  | 0.00  | 0.00  | 0.00  |
| 36 | 1 | 0.06  | 0.00  | -0.14 | 0.00  | 0.00  | 0.00  | 0.00  | 0.00  | 0.00  |
| 37 | 1 | 0.02  | -0.02 | 0.03  | 0.00  | 0.00  | 0.00  | 0.00  | 0.00  | 0.00  |
| 38 | 1 | -0.10 | 0.11  | -0.10 | 0.00  | 0.00  | 0.00  | 0.00  | 0.00  | 0.00  |
| 39 | 1 | -0.01 | -0.04 | 0.01  | 0.01  | -0.01 | 0.00  | 0.01  | -0.01 | 0.00  |
| 40 | 1 | 0.01  | 0.16  | -0.02 | 0.00  | 0.00  | 0.00  | 0.01  | 0.00  | 0.01  |
| 41 | 1 | 0.10  | 0.03  | -0.11 | 0.00  | 0.00  | 0.00  | 0.00  | 0.00  | -0.01 |
| 42 | 1 | -0.02 | 0.00  | -0.01 | 0.04  | 0.07  | -0.05 | 0.02  | -0.06 | 0.03  |
| 43 | 1 | -0.04 | 0.06  | -0.01 | -0.03 | 0.00  | -0.11 | 0.00  | 0.00  | 0.01  |
| 44 | 1 | 0.00  | 0.00  | 0.00  | 0.00  | -0.02 | -0.02 | -0.02 | -0.14 | -0.18 |
| 45 | 1 | 0.00  | 0.00  | 0.00  | -0.02 | -0.01 | 0.00  | -0.13 | -0.07 | -0.04 |
| 46 | 1 | 0.00  | 0.00  | 0.00  | -0.02 | -0.01 | 0.00  | -0.11 | -0.11 | -0.01 |

**Table S5.** B3LYP/6-31+G(d) Optimized cartesian coordinates, energies, and calculated frequencies of carbonyl groups in chloroform for *N*-Boc-L-proline-L-serine-OMe **7**

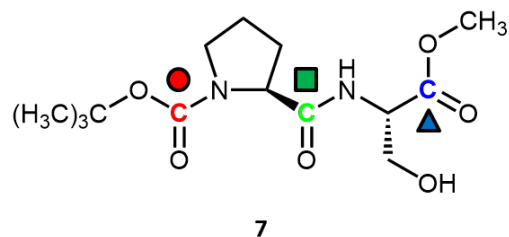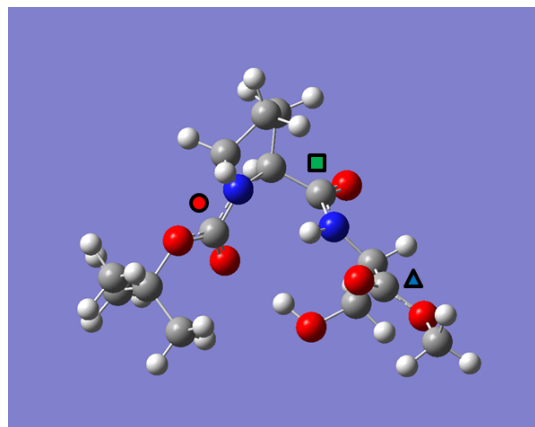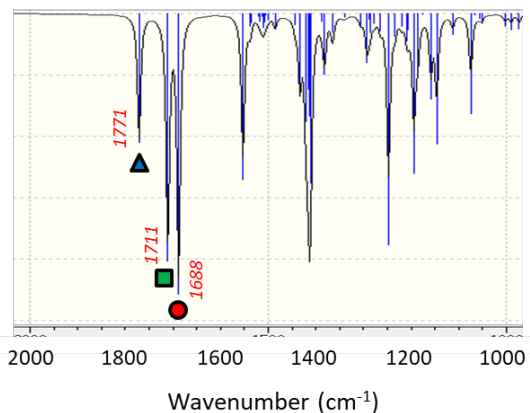

Zero-point correction = 0.389152 (Hartree/Particle)  
 Thermal correction to Energy = 0.413188  
 Thermal correction to Enthalpy = 0.414132  
 Thermal correction to Gibbs Free Energy = 0.334384  
 Sum of electronic and zero-point Energies = -1108.512193  
 Sum of electronic and thermal Energies = -1108.488157  
 Sum of electronic and thermal Enthalpies = -1108.487213  
 Sum of electronic and thermal Free Energies = -1108.566961

| Center<br>Number | Atomic<br>Number | Atomic<br>Type | Coordinates (Angstroms) |           |           |
|------------------|------------------|----------------|-------------------------|-----------|-----------|
|                  |                  |                | X                       | Y         | Z         |
| 1                | 7                | 0              | 1.280411                | 1.327419  | -0.250215 |
| 2                | 6                | 0              | 0.516009                | 2.313395  | 0.530863  |
| 3                | 6                | 0              | 0.645253                | 3.611875  | -0.303131 |
| 4                | 6                | 0              | 0.916897                | 3.115253  | -1.733348 |
| 5                | 6                | 0              | 1.798633                | 1.879693  | -1.519539 |
| 6                | 6                | 0              | 1.712622                | 0.171250  | 0.331517  |
| 7                | 8                | 0              | 1.281274                | -0.236355 | 1.416631  |
| 8                | 8                | 0              | 2.629581                | -0.447062 | -0.431343 |
| 9                | 6                | 0              | 3.213036                | -1.766342 | -0.072443 |
| 10               | 6                | 0              | 4.172127                | -2.022556 | -1.237626 |
| 11               | 6                | 0              | 3.979572                | -1.657035 | 1.248557  |
| 12               | 6                | 0              | 2.114509                | -2.831709 | -0.030567 |
| 13               | 6                | 0              | -0.941038               | 1.915053  | 0.815685  |

|    |   |   |           |           |           |
|----|---|---|-----------|-----------|-----------|
| 14 | 8 | 0 | -1.586667 | 2.527833  | 1.672352  |
| 15 | 7 | 0 | -1.440898 | 0.879076  | 0.104119  |
| 16 | 1 | 0 | -0.837926 | 0.413312  | -0.564447 |
| 17 | 6 | 0 | -2.649204 | 0.169109  | 0.486966  |
| 18 | 6 | 0 | -2.416307 | -0.647355 | 1.788241  |
| 19 | 1 | 0 | -3.456400 | 0.885219  | 0.675724  |
| 20 | 6 | 0 | -3.053009 | -0.733181 | -0.672136 |
| 21 | 8 | 0 | -2.361128 | -0.949194 | -1.650803 |
| 22 | 8 | 0 | -4.259090 | -1.274160 | -0.465089 |
| 23 | 6 | 0 | -4.738676 | -2.197152 | -1.470889 |
| 24 | 8 | 0 | -1.337226 | -1.559969 | 1.665711  |
| 25 | 1 | 0 | -0.491921 | -1.064988 | 1.646774  |
| 26 | 1 | 0 | 0.962933  | 2.434340  | 1.522596  |
| 27 | 1 | 0 | -0.244974 | 4.240088  | -0.217808 |
| 28 | 1 | 0 | 1.499456  | 4.190245  | 0.065759  |
| 29 | 1 | 0 | -0.019822 | 2.829297  | -2.226163 |
| 30 | 1 | 0 | 1.408421  | 3.868475  | -2.355848 |
| 31 | 1 | 0 | 1.714704  | 1.140107  | -2.319044 |
| 32 | 1 | 0 | 2.856942  | 2.150737  | -1.411869 |
| 33 | 1 | 0 | 3.629128  | -2.058532 | -2.188165 |
| 34 | 1 | 0 | 4.930270  | -1.234379 | -1.298419 |
| 35 | 1 | 0 | 4.680849  | -2.981586 | -1.093340 |
| 36 | 1 | 0 | 4.516434  | -2.595119 | 1.430425  |
| 37 | 1 | 0 | 4.718052  | -0.848747 | 1.198795  |
| 38 | 1 | 0 | 3.307029  | -1.472516 | 2.088380  |
| 39 | 1 | 0 | 1.542378  | -2.832852 | -0.964990 |
| 40 | 1 | 0 | 1.428977  | -2.675238 | 0.804270  |
| 41 | 1 | 0 | 2.576928  | -3.818713 | 0.084387  |
| 42 | 1 | 0 | -2.246991 | 0.064064  | 2.604956  |
| 43 | 1 | 0 | -3.311011 | -1.232750 | 2.014393  |
| 44 | 1 | 0 | -5.715472 | -2.522930 | -1.115753 |
| 45 | 1 | 0 | -4.054847 | -3.044445 | -1.556664 |
| 46 | 1 | 0 | -4.826219 | -1.689070 | -2.433846 |

|                |           |       |       |           |       |       |           |       |      |      |
|----------------|-----------|-------|-------|-----------|-------|-------|-----------|-------|------|------|
| Frequencies -- | 1688.1055 |       |       | 1710.7314 |       |       | 1771.0112 |       |      |      |
| Red. masses -- | 10.0755   |       |       | 9.6671    |       |       | 10.9113   |       |      |      |
| Frc consts --  | 16.9167   |       |       | 16.6689   |       |       | 20.1637   |       |      |      |
| IR Inten --    | 618.9953  |       |       | 553.2475  |       |       | 298.7386  |       |      |      |
| Atom           | AN        | X     | Y     | Z         | X     | Y     | Z         | X     | Y    | Z    |
| 1              | 7         | 0.01  | 0.11  | -0.10     | 0.01  | 0.01  | -0.02     | 0.00  | 0.00 | 0.00 |
| 2              | 6         | -0.03 | 0.01  | 0.03      | 0.04  | -0.02 | -0.03     | -0.01 | 0.00 | 0.01 |
| 3              | 6         | 0.01  | 0.00  | -0.01     | -0.01 | 0.01  | -0.01     | 0.00  | 0.00 | 0.00 |
| 4              | 6         | 0.00  | 0.00  | 0.01      | 0.00  | -0.01 | 0.00      | 0.00  | 0.00 | 0.00 |
| 5              | 6         | -0.01 | 0.01  | -0.01     | 0.00  | 0.00  | 0.00      | 0.00  | 0.00 | 0.00 |
| 6              | 6         | -0.22 | -0.31 | 0.64      | 0.00  | -0.03 | 0.04      | 0.00  | 0.00 | 0.01 |
| 7              | 8         | 0.14  | 0.14  | -0.36     | 0.01  | 0.01  | -0.02     | 0.00  | 0.00 | 0.00 |
| 8              | 8         | 0.03  | 0.01  | -0.06     | 0.00  | 0.01  | 0.00      | 0.00  | 0.00 | 0.00 |
| 9              | 6         | -0.01 | -0.04 | 0.04      | 0.00  | 0.00  | 0.00      | 0.00  | 0.00 | 0.00 |
| 10             | 6         | 0.00  | 0.01  | -0.01     | 0.00  | 0.00  | 0.00      | 0.00  | 0.00 | 0.00 |
| 11             | 6         | 0.00  | 0.00  | 0.01      | 0.00  | 0.00  | 0.00      | 0.00  | 0.00 | 0.00 |
| 12             | 6         | 0.00  | 0.00  | 0.00      | 0.00  | 0.00  | 0.00      | 0.00  | 0.00 | 0.00 |



|    |   |       |       |       |       |       |       |       |       |       |
|----|---|-------|-------|-------|-------|-------|-------|-------|-------|-------|
| 13 | 6 | 0.00  | -0.05 | -0.04 | -0.34 | 0.37  | 0.50  | 0.05  | -0.05 | -0.07 |
| 14 | 8 | -0.01 | 0.01  | 0.01  | 0.22  | -0.21 | -0.29 | -0.03 | 0.02  | 0.04  |
| 15 | 7 | 0.02  | 0.04  | 0.01  | 0.04  | -0.05 | -0.06 | -0.01 | 0.01  | 0.02  |
| 16 | 1 | -0.12 | -0.15 | 0.01  | -0.25 | -0.28 | -0.14 | 0.13  | 0.12  | 0.07  |
| 17 | 6 | 0.00  | -0.01 | 0.00  | -0.03 | -0.01 | 0.01  | 0.01  | -0.04 | -0.05 |
| 18 | 6 | 0.01  | -0.01 | 0.00  | 0.01  | 0.00  | 0.01  | -0.01 | 0.01  | -0.01 |
| 19 | 1 | 0.03  | 0.02  | -0.02 | 0.02  | 0.08  | -0.01 | -0.06 | -0.08 | -0.15 |
| 20 | 6 | 0.01  | 0.00  | 0.00  | -0.05 | 0.02  | 0.08  | -0.41 | 0.15  | 0.62  |
| 21 | 8 | 0.00  | 0.00  | 0.00  | 0.04  | -0.01 | -0.05 | 0.26  | -0.09 | -0.39 |
| 22 | 8 | 0.00  | 0.00  | 0.00  | 0.01  | 0.01  | 0.00  | 0.04  | 0.00  | -0.04 |
| 23 | 6 | 0.00  | 0.00  | 0.00  | 0.00  | 0.00  | 0.00  | 0.01  | 0.02  | 0.03  |
| 24 | 8 | 0.01  | 0.01  | 0.00  | 0.00  | 0.00  | 0.00  | 0.00  | 0.00  | 0.00  |
| 25 | 1 | 0.00  | -0.09 | -0.06 | 0.03  | -0.04 | 0.03  | 0.00  | 0.01  | 0.00  |
| 26 | 1 | 0.12  | -0.08 | 0.00  | -0.25 | -0.01 | 0.12  | 0.04  | 0.00  | -0.02 |
| 27 | 1 | -0.02 | -0.05 | 0.03  | -0.04 | -0.02 | 0.01  | 0.00  | 0.00  | 0.00  |
| 28 | 1 | 0.00  | 0.00  | 0.01  | 0.02  | -0.07 | 0.06  | 0.00  | 0.01  | -0.01 |
| 29 | 1 | 0.00  | 0.00  | 0.00  | 0.00  | 0.02  | -0.02 | 0.00  | 0.00  | 0.00  |
| 30 | 1 | 0.02  | -0.02 | 0.00  | -0.02 | 0.01  | 0.01  | 0.00  | 0.00  | 0.00  |
| 31 | 1 | -0.07 | -0.07 | 0.06  | -0.01 | -0.01 | 0.01  | 0.01  | 0.00  | 0.00  |
| 32 | 1 | -0.01 | -0.04 | 0.18  | 0.00  | 0.00  | 0.02  | 0.00  | 0.00  | -0.01 |
| 33 | 1 | 0.02  | 0.01  | -0.02 | 0.00  | 0.00  | 0.00  | 0.00  | 0.00  | 0.00  |
| 34 | 1 | 0.01  | 0.00  | -0.03 | 0.00  | 0.00  | 0.00  | 0.00  | 0.00  | 0.00  |
| 35 | 1 | -0.04 | -0.01 | 0.06  | 0.00  | 0.00  | 0.00  | 0.00  | 0.00  | 0.00  |
| 36 | 1 | 0.05  | 0.00  | -0.14 | 0.00  | 0.00  | -0.01 | 0.00  | 0.00  | 0.00  |
| 37 | 1 | 0.03  | -0.03 | 0.03  | 0.00  | 0.00  | 0.00  | 0.00  | 0.00  | 0.00  |
| 38 | 1 | -0.10 | 0.09  | -0.09 | 0.00  | 0.00  | 0.00  | 0.00  | 0.00  | 0.00  |
| 39 | 1 | -0.01 | -0.05 | 0.01  | 0.00  | -0.01 | 0.00  | 0.01  | 0.00  | 0.00  |
| 40 | 1 | 0.00  | 0.16  | -0.02 | 0.00  | 0.00  | 0.00  | 0.00  | 0.00  | 0.00  |
| 41 | 1 | 0.10  | 0.03  | -0.11 | 0.00  | 0.00  | 0.00  | 0.00  | 0.00  | 0.00  |
| 42 | 1 | -0.02 | -0.01 | 0.00  | 0.03  | 0.06  | -0.04 | 0.02  | -0.07 | 0.03  |
| 43 | 1 | -0.04 | 0.06  | 0.00  | -0.04 | 0.02  | -0.11 | 0.01  | -0.01 | 0.01  |
| 44 | 1 | 0.00  | 0.00  | 0.00  | 0.00  | -0.02 | -0.02 | -0.02 | -0.14 | -0.20 |
| 45 | 1 | 0.00  | 0.00  | 0.00  | -0.02 | -0.01 | 0.00  | -0.13 | -0.06 | -0.06 |
| 46 | 1 | 0.00  | 0.00  | 0.00  | -0.02 | -0.01 | 0.00  | -0.10 | -0.12 | -0.02 |

**Table S6.** B3LYP/6-31+G(d) Optimized cartesian coordinates, energies, and calculated frequencies of carbonyl groups in acetonitrile for *N*-Boc-L-proline-L-serine-OMe **7**

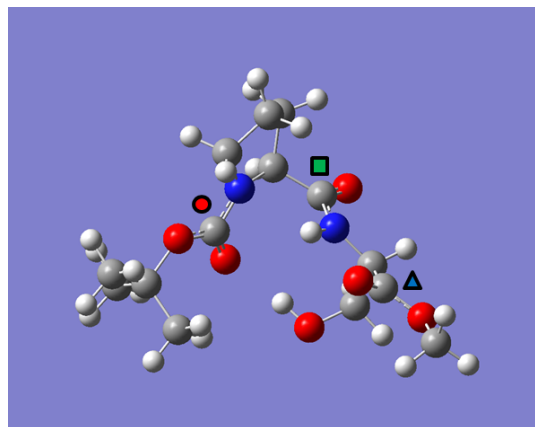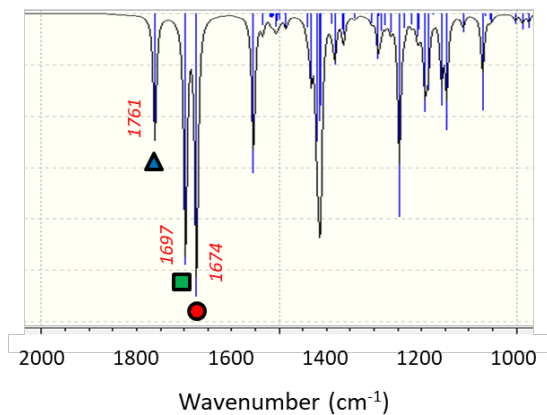

Zero-point correction = 0.388894 (Hartree/Particle)  
 Thermal correction to Energy = 0.412963  
 Thermal correction to Enthalpy = 0.413907  
 Thermal correction to Gibbs Free Energy = 0.333811  
 Sum of electronic and zero-point Energies = -1108.517566  
 Sum of electronic and thermal Energies = -1108.493497  
 Sum of electronic and thermal Enthalpies = -1108.492553  
 Sum of electronic and thermal Free Energies = -1108.572650

| Center Number | Atomic Number | Atomic Type | Coordinates (Angstroms) |           |           |
|---------------|---------------|-------------|-------------------------|-----------|-----------|
|               |               |             | X                       | Y         | Z         |
| 1             | 7             | 0           | 1.272506                | 1.329984  | -0.252399 |
| 2             | 6             | 0           | 0.508607                | 2.310048  | 0.535349  |
| 3             | 6             | 0           | 0.606150                | 3.607121  | -0.307498 |
| 4             | 6             | 0           | 0.881851                | 3.110427  | -1.736897 |
| 5             | 6             | 0           | 1.782719                | 1.889531  | -1.522607 |
| 6             | 6             | 0           | 1.712719                | 0.175647  | 0.323663  |
| 7             | 8             | 0           | 1.286264                | -0.236358 | 1.411520  |
| 8             | 8             | 0           | 2.627688                | -0.438064 | -0.442575 |
| 9             | 6             | 0           | 3.234840                | -1.747814 | -0.083409 |
| 10            | 6             | 0           | 4.179999                | -1.998596 | -1.260887 |
| 11            | 6             | 0           | 4.018979                | -1.616750 | 1.224960  |
| 12            | 6             | 0           | 2.152966                | -2.828753 | -0.017917 |
| 13            | 6             | 0           | -0.936025               | 1.890946  | 0.846768  |

|    |   |   |           |           |           |
|----|---|---|-----------|-----------|-----------|
| 14 | 8 | 0 | -1.564844 | 2.475363  | 1.738229  |
| 15 | 7 | 0 | -1.447496 | 0.872296  | 0.121611  |
| 16 | 1 | 0 | -0.860796 | 0.433143  | -0.579282 |
| 17 | 6 | 0 | -2.648882 | 0.150474  | 0.505668  |
| 18 | 6 | 0 | -2.395050 | -0.693828 | 1.784699  |
| 19 | 1 | 0 | -3.456594 | 0.858025  | 0.721181  |
| 20 | 6 | 0 | -3.067756 | -0.729043 | -0.665861 |
| 21 | 8 | 0 | -2.380772 | -0.934585 | -1.651402 |
| 22 | 8 | 0 | -4.274602 | -1.263331 | -0.460032 |
| 23 | 6 | 0 | -4.775130 | -2.162833 | -1.479159 |
| 24 | 8 | 0 | -1.304182 | -1.590193 | 1.631615  |
| 25 | 1 | 0 | -0.466243 | -1.081764 | 1.601751  |
| 26 | 1 | 0 | 0.971351  | 2.444484  | 1.518104  |
| 27 | 1 | 0 | -0.296964 | 4.217080  | -0.223376 |
| 28 | 1 | 0 | 1.449313  | 4.204551  | 0.055323  |
| 29 | 1 | 0 | -0.051019 | 2.809370  | -2.227751 |
| 30 | 1 | 0 | 1.361380  | 3.869912  | -2.360745 |
| 31 | 1 | 0 | 1.708807  | 1.148086  | -2.321004 |
| 32 | 1 | 0 | 2.836134  | 2.177384  | -1.413553 |
| 33 | 1 | 0 | 3.623089  | -2.052227 | -2.202506 |
| 34 | 1 | 0 | 4.924141  | -1.198823 | -1.339618 |
| 35 | 1 | 0 | 4.706303  | -2.947797 | -1.115729 |
| 36 | 1 | 0 | 4.570503  | -2.546102 | 1.406997  |
| 37 | 1 | 0 | 4.745646  | -0.799259 | 1.157535  |
| 38 | 1 | 0 | 3.356521  | -1.434243 | 2.073428  |
| 39 | 1 | 0 | 1.563376  | -2.840317 | -0.941370 |
| 40 | 1 | 0 | 1.482332  | -2.679965 | 0.830470  |
| 41 | 1 | 0 | 2.632608  | -3.808136 | 0.089906  |
| 42 | 1 | 0 | -2.226240 | -0.001701 | 2.617639  |
| 43 | 1 | 0 | -3.280107 | -1.295441 | 2.005077  |
| 44 | 1 | 0 | -5.750160 | -2.486797 | -1.118396 |
| 45 | 1 | 0 | -4.100249 | -3.014266 | -1.589178 |
| 46 | 1 | 0 | -4.870534 | -1.633278 | -2.429447 |

|               |    |           |       |       |           |       |       |           |      |      |
|---------------|----|-----------|-------|-------|-----------|-------|-------|-----------|------|------|
| Frequencies — |    | 1673.7049 |       |       | 1696.8674 |       |       | 1761.3669 |      |      |
| Red. masses — |    | 9.7713    |       |       | 9.2867    |       |       | 10.8457   |      |      |
| Frc consts —  |    | 16.1272   |       |       | 15.7546   |       |       | 19.8247   |      |      |
| IR Inten —    |    | 769.5763  |       |       | 693.4302  |       |       | 353.9204  |      |      |
| Atom          | AN | X         | Y     | Z     | X         | Y     | Z     | X         | Y    | Z    |
| 1             | 7  | 0.01      | 0.11  | −0.10 | 0.00      | 0.01  | −0.02 | 0.00      | 0.00 | 0.00 |
| 2             | 6  | −0.03     | 0.01  | 0.03  | 0.05      | −0.02 | −0.04 | −0.01     | 0.00 | 0.01 |
| 3             | 6  | 0.01      | 0.00  | −0.01 | −0.01     | 0.01  | −0.01 | 0.00      | 0.00 | 0.00 |
| 4             | 6  | 0.00      | 0.00  | 0.01  | 0.00      | −0.01 | 0.00  | 0.00      | 0.00 | 0.00 |
| 5             | 6  | −0.01     | 0.02  | −0.02 | 0.00      | 0.00  | 0.00  | 0.00      | 0.00 | 0.00 |
| 6             | 6  | −0.21     | −0.31 | 0.63  | 0.00      | −0.03 | 0.03  | 0.00      | 0.00 | 0.00 |
| 7             | 8  | 0.13      | 0.14  | −0.35 | 0.00      | 0.01  | −0.02 | 0.00      | 0.00 | 0.00 |
| 8             | 8  | 0.03      | 0.01  | −0.06 | 0.00      | 0.01  | 0.00  | 0.00      | 0.00 | 0.00 |
| 9             | 6  | −0.01     | −0.04 | 0.04  | 0.00      | 0.00  | 0.00  | 0.00      | 0.00 | 0.00 |
| 10            | 6  | 0.00      | 0.01  | −0.01 | 0.00      | 0.00  | 0.00  | 0.00      | 0.00 | 0.00 |
| 11            | 6  | 0.00      | 0.00  | 0.01  | 0.00      | 0.00  | 0.00  | 0.00      | 0.00 | 0.00 |
| 12            | 6  | 0.00      | 0.00  | 0.00  | 0.00      | 0.00  | 0.00  | 0.00      | 0.00 | 0.00 |

|    |   |       |       |       |       |       |       |       |       |       |
|----|---|-------|-------|-------|-------|-------|-------|-------|-------|-------|
| 13 | 6 | -0.01 | -0.05 | -0.04 | -0.33 | 0.35  | 0.51  | 0.06  | -0.05 | -0.08 |
| 14 | 8 | -0.01 | 0.01  | 0.01  | 0.21  | -0.19 | -0.29 | -0.03 | 0.03  | 0.04  |
| 15 | 7 | 0.02  | 0.04  | 0.01  | 0.04  | -0.04 | -0.06 | -0.01 | 0.01  | 0.02  |
| 16 | 1 | -0.13 | -0.16 | 0.00  | -0.27 | -0.29 | -0.14 | 0.13  | 0.12  | 0.07  |
| 17 | 6 | 0.00  | -0.01 | -0.01 | -0.03 | -0.02 | 0.01  | 0.01  | -0.04 | -0.05 |
| 18 | 6 | 0.00  | -0.01 | 0.00  | 0.01  | 0.00  | 0.01  | -0.01 | 0.01  | -0.01 |
| 19 | 1 | 0.03  | 0.02  | -0.02 | 0.03  | 0.08  | -0.02 | -0.07 | -0.08 | -0.15 |
| 20 | 6 | 0.01  | 0.00  | 0.00  | -0.06 | 0.02  | 0.08  | -0.40 | 0.15  | 0.62  |
| 21 | 8 | 0.00  | 0.00  | 0.00  | 0.04  | -0.01 | -0.06 | 0.26  | -0.09 | -0.39 |
| 22 | 8 | 0.00  | 0.00  | 0.00  | 0.01  | 0.01  | 0.00  | 0.04  | 0.00  | -0.04 |
| 23 | 6 | 0.00  | 0.00  | 0.00  | 0.00  | 0.00  | 0.00  | 0.01  | 0.02  | 0.03  |
| 24 | 8 | 0.01  | 0.01  | 0.00  | 0.00  | 0.00  | 0.00  | 0.00  | 0.00  | 0.00  |
| 25 | 1 | 0.00  | -0.09 | -0.06 | 0.03  | -0.05 | 0.03  | 0.00  | 0.01  | -0.01 |
| 26 | 1 | 0.13  | -0.07 | -0.01 | -0.26 | -0.01 | 0.13  | 0.05  | 0.00  | -0.02 |
| 27 | 1 | -0.02 | -0.05 | 0.04  | -0.04 | -0.02 | 0.01  | 0.01  | 0.00  | 0.00  |
| 28 | 1 | 0.00  | -0.01 | 0.01  | 0.03  | -0.07 | 0.07  | 0.00  | 0.01  | -0.01 |
| 29 | 1 | 0.00  | 0.01  | -0.01 | 0.00  | 0.02  | -0.02 | 0.00  | 0.00  | 0.00  |
| 30 | 1 | 0.02  | -0.02 | 0.00  | -0.01 | 0.01  | 0.01  | 0.00  | 0.00  | 0.00  |
| 31 | 1 | -0.08 | -0.08 | 0.07  | -0.02 | -0.01 | 0.01  | 0.00  | 0.00  | 0.00  |
| 32 | 1 | -0.01 | -0.04 | 0.21  | 0.00  | 0.00  | 0.03  | 0.00  | 0.00  | -0.01 |
| 33 | 1 | 0.01  | 0.02  | -0.02 | 0.00  | 0.00  | 0.00  | 0.00  | 0.00  | 0.00  |
| 34 | 1 | 0.00  | 0.01  | -0.03 | 0.00  | 0.00  | 0.00  | 0.00  | 0.00  | 0.00  |
| 35 | 1 | -0.04 | -0.01 | 0.07  | 0.00  | 0.00  | 0.01  | 0.00  | 0.00  | 0.00  |
| 36 | 1 | 0.05  | 0.00  | -0.14 | 0.00  | 0.00  | -0.01 | 0.00  | 0.00  | 0.00  |
| 37 | 1 | 0.03  | -0.02 | 0.03  | 0.00  | 0.00  | 0.00  | 0.00  | 0.00  | 0.00  |
| 38 | 1 | -0.10 | 0.09  | -0.09 | 0.00  | 0.00  | 0.00  | 0.00  | 0.00  | 0.00  |
| 39 | 1 | -0.01 | -0.05 | 0.01  | 0.00  | 0.00  | 0.00  | 0.00  | 0.00  | 0.00  |
| 40 | 1 | -0.01 | 0.16  | -0.02 | 0.00  | 0.00  | 0.00  | 0.00  | 0.00  | 0.00  |
| 41 | 1 | 0.10  | 0.04  | -0.12 | 0.00  | 0.00  | 0.00  | 0.00  | 0.00  | 0.00  |
| 42 | 1 | -0.02 | -0.01 | 0.00  | 0.03  | 0.05  | -0.04 | 0.02  | -0.07 | 0.03  |
| 43 | 1 | -0.04 | 0.07  | 0.01  | -0.05 | 0.03  | -0.11 | 0.01  | -0.01 | 0.02  |
| 44 | 1 | 0.00  | 0.00  | 0.00  | 0.00  | -0.02 | -0.03 | -0.03 | -0.14 | -0.20 |
| 45 | 1 | 0.00  | 0.00  | 0.00  | -0.02 | -0.01 | -0.01 | -0.13 | -0.06 | -0.07 |
| 46 | 1 | 0.00  | 0.00  | 0.00  | -0.02 | -0.02 | 0.00  | -0.09 | -0.13 | -0.02 |

**Table S7.** B3LYP/6-31+G(d) Optimized cartesian coordinates, energies, and calculated frequencies of carbonyl groups in the gas phase for *N*-Boc-L-alanine-L-proline-OMe **9**

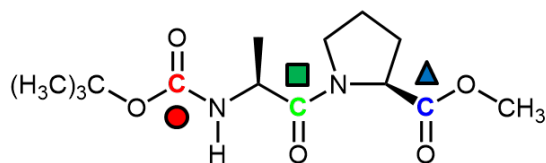

**9**

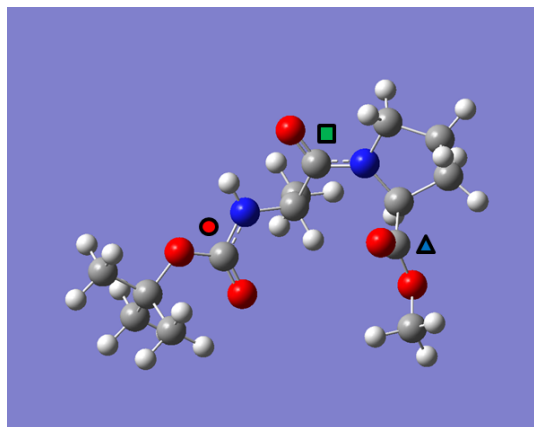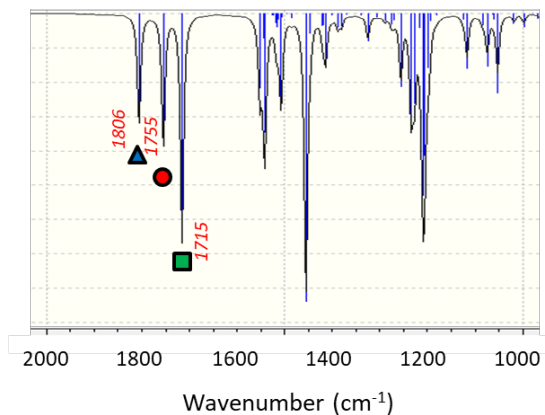

Zero-point correction = 0.383927 (Hartree/Particle)  
 Thermal correction to Energy = 0.407410  
 Thermal correction to Enthalpy = 0.408354  
 Thermal correction to Gibbs Free Energy = 0.328750  
 Sum of electronic and zero-point Energies = -1033.282259  
 Sum of electronic and thermal Energies = -1033.258776  
 Sum of electronic and thermal Enthalpies = -1033.257832  
 Sum of electronic and thermal Free Energies = -1033.337436

| Center<br>Number | Atomic<br>Number | Atomic<br>Type | Coordinates (Angstroms) |           |           |
|------------------|------------------|----------------|-------------------------|-----------|-----------|
|                  |                  |                | X                       | Y         | Z         |
| 1                | 7                | 0              | 2.428189                | -1.096411 | -0.132740 |
| 2                | 6                | 0              | 2.913168                | 0.125628  | 0.505031  |
| 3                | 6                | 0              | 4.451715                | -0.013191 | 0.381001  |
| 4                | 6                | 0              | 4.634697                | -0.774115 | -0.943421 |
| 5                | 6                | 0              | 3.449826                | -1.751052 | -0.973930 |
| 6                | 6                | 0              | -2.161772               | -0.201131 | 0.368830  |
| 7                | 8                | 0              | -2.071994               | 0.837551  | 1.014689  |
| 8                | 8                | 0              | -3.246265               | -0.610333 | -0.336890 |
| 9                | 6                | 0              | -4.481183               | 0.190918  | -0.388409 |
| 10               | 6                | 0              | -5.390941               | -0.661691 | -1.278119 |
| 11               | 6                | 0              | -5.078346               | 0.334205  | 1.016327  |
| 12               | 6                | 0              | -4.204051               | 1.548994  | -1.043722 |
| 13               | 6                | 0              | 2.423558                | 1.391740  | -0.211278 |
| 14               | 8                | 0              | 2.100881                | 1.457880  | -1.377689 |

|    |   |   |           |           |           |
|----|---|---|-----------|-----------|-----------|
| 15 | 7 | 0 | -1.169891 | -1.126786 | 0.265159  |
| 16 | 1 | 0 | -1.279485 | -1.922909 | -0.352891 |
| 17 | 6 | 0 | 0.144938  | -0.911839 | 0.840029  |
| 18 | 6 | 0 | 0.247496  | -1.493307 | 2.266362  |
| 19 | 1 | 0 | 0.305218  | 0.168663  | 0.885101  |
| 20 | 6 | 0 | 1.164398  | -1.597408 | -0.085211 |
| 21 | 8 | 0 | 0.845181  | -2.606695 | -0.718304 |
| 22 | 8 | 0 | 2.435419  | 2.439840  | 0.635349  |
| 23 | 6 | 0 | 2.019519  | 3.708255  | 0.084876  |
| 24 | 1 | 0 | 2.609001  | 0.185935  | 1.552828  |
| 25 | 1 | 0 | 4.960780  | 0.954654  | 0.408789  |
| 26 | 1 | 0 | 4.817187  | -0.609505 | 1.225297  |
| 27 | 1 | 0 | 4.574008  | -0.081235 | -1.789340 |
| 28 | 1 | 0 | 5.597950  | -1.290358 | -0.998533 |
| 29 | 1 | 0 | 3.052004  | -1.921010 | -1.977673 |
| 30 | 1 | 0 | 3.700754  | -2.729270 | -0.545027 |
| 31 | 1 | 0 | -6.362966 | -0.170895 | -1.400153 |
| 32 | 1 | 0 | -4.944408 | -0.799872 | -2.268721 |
| 33 | 1 | 0 | -5.553705 | -1.649058 | -0.832576 |
| 34 | 1 | 0 | -5.216203 | -0.651922 | 1.474786  |
| 35 | 1 | 0 | -4.436874 | 0.937848  | 1.661505  |
| 36 | 1 | 0 | -6.060975 | 0.816442  | 0.948026  |
| 37 | 1 | 0 | -3.730266 | 1.410735  | -2.022396 |
| 38 | 1 | 0 | -5.151230 | 2.080282  | -1.196848 |
| 39 | 1 | 0 | -3.553704 | 2.165349  | -0.419886 |
| 40 | 1 | 0 | 1.237133  | -1.318053 | 2.705622  |
| 41 | 1 | 0 | -0.502444 | -1.016648 | 2.904854  |
| 42 | 1 | 0 | 0.063720  | -2.572729 | 2.246794  |
| 43 | 1 | 0 | 2.676288  | 3.996164  | -0.740071 |
| 44 | 1 | 0 | 0.989308  | 3.640322  | -0.272639 |
| 45 | 1 | 0 | 2.096900  | 4.417473  | 0.908779  |

|               |    |           |       |       |           |       |       |           |       |       |
|---------------|----|-----------|-------|-------|-----------|-------|-------|-----------|-------|-------|
| Frequencies — |    | 1715.4737 |       |       | 1754.6591 |       |       | 1805.8503 |       |       |
| Red. masses — |    | 10.6411   |       |       | 10.2399   |       |       | 11.0093   |       |       |
| Frc consts —  |    | 18.4504   |       |       | 18.5752   |       |       | 21.1531   |       |       |
| IR Inten —    |    | 384.2178  |       |       | 227.5007  |       |       | 190.6316  |       |       |
| Atom          | AN | X         | Y     | Z     | X         | Y     | Z     | X         | Y     | Z     |
| 1             | 7  | -0.06     | -0.08 | -0.03 | 0.00      | 0.01  | 0.01  | 0.00      | -0.01 | 0.00  |
| 2             | 6  | -0.02     | -0.01 | 0.00  | 0.00      | 0.00  | 0.00  | -0.01     | 0.02  | -0.05 |
| 3             | 6  | 0.00      | 0.00  | 0.00  | 0.00      | 0.00  | 0.00  | -0.01     | 0.00  | 0.00  |
| 4             | 6  | 0.00      | -0.01 | -0.01 | 0.00      | 0.00  | 0.00  | 0.00      | 0.00  | 0.01  |
| 5             | 6  | -0.01     | 0.02  | 0.02  | 0.00      | 0.00  | 0.00  | 0.00      | 0.00  | 0.00  |
| 6             | 6  | -0.02     | 0.09  | 0.05  | -0.03     | 0.65  | 0.37  | 0.00      | 0.00  | 0.00  |
| 7             | 8  | 0.00      | -0.05 | -0.03 | -0.02     | -0.36 | -0.22 | 0.00      | 0.00  | 0.00  |
| 8             | 8  | 0.00      | -0.01 | -0.01 | -0.01     | -0.05 | -0.04 | 0.00      | 0.00  | 0.00  |
| 9             | 6  | 0.00      | 0.01  | 0.00  | -0.01     | 0.04  | 0.02  | 0.00      | 0.00  | 0.00  |
| 10            | 6  | 0.00      | 0.00  | 0.00  | 0.01      | -0.01 | 0.00  | 0.00      | 0.00  | 0.00  |
| 11            | 6  | 0.00      | 0.00  | 0.00  | 0.00      | 0.00  | 0.01  | 0.00      | 0.00  | 0.00  |
| 12            | 6  | 0.00      | 0.00  | 0.00  | 0.00      | 0.01  | 0.00  | 0.00      | 0.00  | 0.00  |
| 13            | 6  | 0.00      | 0.00  | -0.03 | 0.00      | 0.01  | 0.00  | 0.21      | -0.07 | 0.73  |

|    |   |       |       |       |       |       |       |       |       |       |
|----|---|-------|-------|-------|-------|-------|-------|-------|-------|-------|
| 14 | 8 | 0.00  | 0.00  | 0.02  | 0.00  | 0.00  | 0.00  | -0.13 | 0.03  | -0.47 |
| 15 | 7 | 0.03  | -0.01 | 0.01  | 0.05  | -0.10 | -0.04 | 0.00  | 0.00  | 0.00  |
| 16 | 1 | -0.21 | 0.04  | -0.02 | 0.27  | -0.19 | 0.04  | -0.01 | 0.00  | 0.00  |
| 17 | 6 | -0.01 | -0.03 | -0.01 | 0.02  | 0.02  | 0.02  | 0.00  | 0.00  | 0.00  |
| 18 | 6 | 0.00  | 0.00  | -0.01 | -0.01 | -0.01 | 0.00  | 0.00  | 0.00  | 0.00  |
| 19 | 1 | 0.24  | -0.05 | -0.20 | -0.14 | 0.06  | 0.00  | 0.03  | -0.01 | 0.02  |
| 20 | 6 | 0.23  | 0.61  | 0.37  | -0.03 | -0.08 | -0.05 | 0.02  | 0.02  | 0.02  |
| 21 | 8 | -0.11 | -0.37 | -0.23 | 0.01  | 0.04  | 0.03  | -0.01 | -0.02 | -0.01 |
| 22 | 8 | 0.00  | 0.01  | 0.00  | 0.00  | 0.00  | 0.00  | -0.01 | -0.01 | -0.05 |
| 23 | 6 | 0.00  | 0.00  | 0.00  | 0.00  | 0.00  | 0.00  | 0.01  | -0.02 | 0.02  |
| 24 | 1 | 0.06  | 0.07  | 0.01  | -0.01 | -0.01 | 0.00  | -0.12 | 0.22  | -0.07 |
| 25 | 1 | 0.01  | 0.00  | -0.01 | 0.00  | 0.00  | 0.00  | 0.00  | -0.01 | 0.02  |
| 26 | 1 | 0.00  | -0.01 | 0.00  | 0.00  | 0.00  | 0.00  | 0.05  | 0.01  | -0.03 |
| 27 | 1 | -0.01 | 0.00  | 0.00  | 0.00  | 0.00  | 0.00  | 0.05  | -0.02 | -0.01 |
| 28 | 1 | 0.03  | 0.04  | 0.01  | -0.01 | -0.01 | 0.00  | 0.01  | 0.01  | -0.06 |
| 29 | 1 | 0.11  | 0.00  | -0.01 | -0.02 | 0.00  | 0.00  | 0.01  | -0.04 | 0.00  |
| 30 | 1 | 0.09  | 0.02  | -0.08 | -0.01 | 0.00  | 0.01  | 0.01  | -0.01 | -0.03 |
| 31 | 1 | 0.00  | 0.00  | 0.00  | 0.02  | 0.04  | 0.03  | 0.00  | 0.00  | 0.00  |
| 32 | 1 | 0.00  | 0.00  | 0.00  | -0.01 | -0.01 | -0.01 | 0.00  | 0.00  | 0.00  |
| 33 | 1 | 0.00  | 0.00  | 0.00  | -0.01 | -0.01 | -0.01 | 0.00  | 0.00  | 0.00  |
| 34 | 1 | -0.01 | 0.00  | 0.00  | -0.03 | 0.01  | 0.02  | 0.00  | 0.00  | 0.00  |
| 35 | 1 | 0.02  | -0.01 | -0.01 | 0.12  | -0.05 | -0.06 | 0.00  | 0.00  | 0.00  |
| 36 | 1 | -0.01 | -0.01 | -0.01 | -0.03 | -0.08 | -0.09 | 0.00  | 0.00  | 0.00  |
| 37 | 1 | 0.00  | 0.01  | 0.00  | -0.02 | 0.03  | -0.01 | 0.00  | 0.00  | 0.00  |
| 38 | 1 | -0.01 | -0.01 | -0.01 | -0.05 | -0.11 | -0.05 | 0.00  | 0.00  | 0.00  |
| 39 | 1 | 0.01  | -0.02 | 0.01  | 0.08  | -0.12 | 0.05  | 0.00  | 0.00  | 0.00  |
| 40 | 1 | 0.01  | -0.01 | -0.01 | 0.02  | 0.00  | -0.06 | 0.00  | 0.00  | 0.00  |
| 41 | 1 | -0.01 | -0.07 | 0.02  | -0.01 | 0.05  | -0.04 | 0.00  | 0.00  | 0.00  |
| 42 | 1 | -0.03 | 0.01  | 0.09  | 0.04  | -0.01 | 0.00  | 0.00  | 0.00  | 0.00  |
| 43 | 1 | 0.00  | 0.00  | 0.00  | 0.01  | -0.01 | 0.01  | -0.04 | 0.13  | 0.05  |
| 44 | 1 | 0.00  | 0.00  | 0.00  | -0.01 | -0.01 | 0.02  | 0.01  | 0.14  | 0.04  |
| 45 | 1 | 0.00  | 0.00  | 0.00  | 0.00  | 0.00  | 0.00  | -0.07 | 0.16  | -0.13 |

**Table S8.** B3LYP/6-31+G(d) Optimized cartesian coordinates, energies, and calculated frequencies of carbonyl groups in chloroform for *N*-Boc-L-alanine-L-proline-OMe **9**

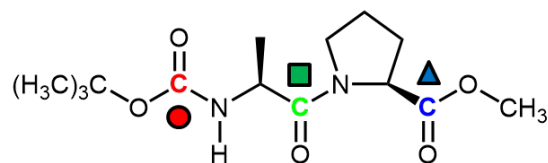

**9**

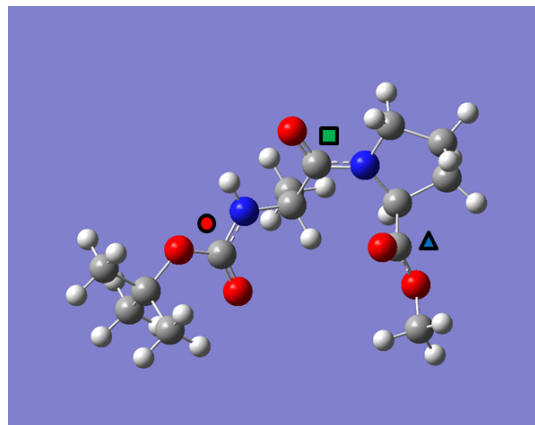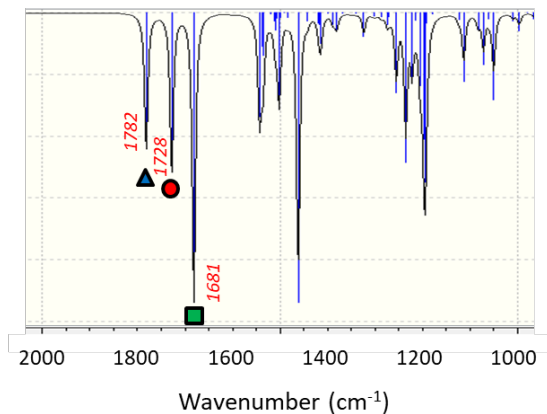

Zero-point correction = 0.383450 (Hartree/Particle)  
 Thermal correction to Energy = 0.406957  
 Thermal correction to Enthalpy = 0.407901  
 Thermal correction to Gibbs Free Energy = 0.328493  
 Sum of electronic and zero-point Energies = -1033.294669  
 Sum of electronic and thermal Energies = -1033.271162  
 Sum of electronic and thermal Enthalpies = -1033.270218  
 Sum of electronic and thermal Free Energies = -1033.349626

| Center<br>Number | Atomic<br>Number | Atomic<br>Type | Coordinates (Angstroms) |           |           |
|------------------|------------------|----------------|-------------------------|-----------|-----------|
|                  |                  |                | X                       | Y         | Z         |
| 1                | 7                | 0              | 2.398096                | -1.111179 | -0.153795 |
| 2                | 6                | 0              | 2.909708                | 0.090564  | 0.507123  |
| 3                | 6                | 0              | 4.445814                | -0.100796 | 0.425556  |
| 4                | 6                | 0              | 4.640004                | -0.860171 | -0.896979 |
| 5                | 6                | 0              | 3.427031                | -1.798538 | -0.964262 |
| 6                | 6                | 0              | -2.192336               | -0.161909 | 0.360403  |
| 7                | 8                | 0              | -2.102339               | 0.868609  | 1.024736  |
| 8                | 8                | 0              | -3.282148               | -0.566065 | -0.336232 |
| 9                | 6                | 0              | -4.531099               | 0.223336  | -0.371206 |
| 10               | 6                | 0              | -5.435296               | -0.630868 | -1.264630 |
| 11               | 6                | 0              | -5.121553               | 0.341830  | 1.037776  |
| 12               | 6                | 0              | -4.273568               | 1.590047  | -1.014469 |
| 13               | 6                | 0              | 2.477650                | 1.375849  | -0.211461 |
| 14               | 8                | 0              | 2.078752                | 1.441316  | -1.357302 |



|    |   |   |           |           |           |
|----|---|---|-----------|-----------|-----------|
| 15 | 7 | 0 | -1.194182 | -1.073090 | 0.222972  |
| 16 | 1 | 0 | -1.326990 | -1.880824 | -0.374596 |
| 17 | 6 | 0 | 0.119053  | -0.895946 | 0.818242  |
| 18 | 6 | 0 | 0.194114  | -1.499829 | 2.236876  |
| 19 | 1 | 0 | 0.306155  | 0.178717  | 0.875802  |
| 20 | 6 | 0 | 1.133987  | -1.593360 | -0.103309 |
| 21 | 8 | 0 | 0.796981  | -2.605164 | -0.734258 |
| 22 | 8 | 0 | 2.630216  | 2.434459  | 0.599741  |
| 23 | 6 | 0 | 2.302921  | 3.730477  | 0.045269  |
| 24 | 1 | 0 | 2.581650  | 0.152867  | 1.547147  |
| 25 | 1 | 0 | 4.985538  | 0.848570  | 0.472592  |
| 26 | 1 | 0 | 4.764563  | -0.713574 | 1.276004  |
| 27 | 1 | 0 | 4.627154  | -0.163246 | -1.741813 |
| 28 | 1 | 0 | 5.585519  | -1.408824 | -0.928040 |
| 29 | 1 | 0 | 3.057652  | -1.957554 | -1.980491 |
| 30 | 1 | 0 | 3.635479  | -2.780872 | -0.523601 |
| 31 | 1 | 0 | -6.411993 | -0.147731 | -1.376317 |
| 32 | 1 | 0 | -4.993458 | -0.753486 | -2.259390 |
| 33 | 1 | 0 | -5.587791 | -1.623628 | -0.827351 |
| 34 | 1 | 0 | -5.239109 | -0.650411 | 1.488243  |
| 35 | 1 | 0 | -4.490828 | 0.953072  | 1.686405  |
| 36 | 1 | 0 | -6.112784 | 0.806165  | 0.977017  |
| 37 | 1 | 0 | -3.802763 | 1.468206  | -1.996611 |
| 38 | 1 | 0 | -5.228590 | 2.109093  | -1.157672 |
| 39 | 1 | 0 | -3.630243 | 2.211179  | -0.388131 |
| 40 | 1 | 0 | 1.183027  | -1.353302 | 2.686330  |
| 41 | 1 | 0 | -0.549685 | -1.016117 | 2.877170  |
| 42 | 1 | 0 | -0.014778 | -2.574216 | 2.201074  |
| 43 | 1 | 0 | 2.944448  | 3.944116  | -0.812746 |
| 44 | 1 | 0 | 1.254316  | 3.751950  | -0.259287 |
| 45 | 1 | 0 | 2.485837  | 4.440362  | 0.850965  |

|               |    |           |       |       |           |       |       |           |       |       |
|---------------|----|-----------|-------|-------|-----------|-------|-------|-----------|-------|-------|
| Frequencies — |    | 1681.2657 |       |       | 1727.9523 |       |       | 1781.5804 |       |       |
| Red. masses — |    | 10.3575   |       |       | 10.3106   |       |       | 11.0547   |       |       |
| Frc consts —  |    | 17.2496   |       |       | 18.1383   |       |       | 20.6731   |       |       |
| IR Inten —    |    | 680.5317  |       |       | 389.1041  |       |       | 331.6460  |       |       |
| Atom          | AN | X         | Y     | Z     | X         | Y     | Z     | X         | Y     | Z     |
| 1             | 7  | -0.08     | -0.08 | -0.03 | 0.00      | 0.01  | 0.01  | -0.01     | -0.01 | 0.00  |
| 2             | 6  | -0.02     | -0.01 | 0.00  | 0.00      | 0.00  | 0.00  | -0.01     | 0.03  | -0.05 |
| 3             | 6  | 0.00      | 0.01  | 0.00  | 0.00      | 0.00  | 0.00  | -0.01     | 0.00  | 0.00  |
| 4             | 6  | 0.00      | -0.01 | -0.01 | 0.00      | 0.00  | 0.00  | 0.00      | 0.00  | 0.00  |
| 5             | 6  | -0.01     | 0.02  | 0.02  | 0.00      | 0.00  | 0.00  | 0.00      | 0.00  | 0.00  |
| 6             | 6  | -0.02     | 0.11  | 0.06  | -0.03     | 0.65  | 0.38  | 0.00      | -0.01 | 0.00  |
| 7             | 8  | 0.00      | -0.06 | -0.04 | -0.02     | -0.35 | -0.22 | 0.00      | 0.00  | 0.00  |
| 8             | 8  | 0.00      | -0.01 | -0.01 | -0.01     | -0.05 | -0.03 | 0.00      | 0.00  | 0.00  |
| 9             | 6  | 0.00      | 0.01  | 0.00  | -0.01     | 0.04  | 0.02  | 0.00      | 0.00  | 0.00  |
| 10            | 6  | 0.00      | 0.00  | 0.00  | 0.01      | -0.01 | 0.00  | 0.00      | 0.00  | 0.00  |
| 11            | 6  | 0.00      | 0.00  | 0.00  | 0.00      | 0.00  | 0.01  | 0.00      | 0.00  | 0.00  |
| 12            | 6  | 0.00      | 0.00  | 0.00  | 0.00      | 0.00  | 0.00  | 0.00      | 0.00  | 0.00  |
| 13            | 6  | -0.01     | 0.00  | -0.03 | 0.00      | 0.00  | 0.01  | 0.25      | -0.07 | 0.72  |

|    |   |       |       |       |       |       |       |       |       |       |
|----|---|-------|-------|-------|-------|-------|-------|-------|-------|-------|
| 14 | 8 | 0.01  | 0.00  | 0.02  | 0.00  | 0.00  | -0.01 | -0.16 | 0.03  | -0.46 |
| 15 | 7 | 0.02  | -0.02 | 0.01  | 0.05  | -0.10 | -0.04 | 0.00  | 0.00  | 0.00  |
| 16 | 1 | -0.18 | 0.03  | -0.02 | 0.29  | -0.18 | 0.02  | -0.01 | 0.00  | 0.00  |
| 17 | 6 | -0.02 | -0.04 | -0.01 | 0.02  | 0.02  | 0.02  | 0.00  | 0.00  | 0.00  |
| 18 | 6 | 0.00  | 0.00  | -0.01 | -0.01 | -0.01 | 0.00  | 0.00  | 0.00  | 0.00  |
| 19 | 1 | 0.27  | -0.07 | -0.21 | -0.13 | 0.07  | 0.01  | 0.03  | -0.01 | 0.02  |
| 20 | 6 | 0.25  | 0.60  | 0.35  | -0.04 | -0.10 | -0.06 | 0.02  | 0.02  | 0.01  |
| 21 | 8 | -0.12 | -0.35 | -0.22 | 0.02  | 0.05  | 0.03  | -0.01 | -0.02 | -0.01 |
| 22 | 8 | 0.00  | 0.01  | 0.00  | 0.00  | 0.00  | 0.00  | -0.01 | -0.01 | -0.05 |
| 23 | 6 | 0.00  | 0.00  | 0.00  | 0.00  | 0.00  | 0.00  | 0.01  | -0.03 | 0.02  |
| 24 | 1 | 0.06  | 0.09  | 0.01  | -0.01 | -0.02 | 0.00  | -0.11 | 0.21  | -0.07 |
| 25 | 1 | 0.03  | -0.01 | -0.01 | -0.01 | 0.00  | 0.00  | 0.00  | -0.01 | 0.02  |
| 26 | 1 | 0.00  | -0.01 | 0.00  | 0.00  | 0.00  | 0.00  | 0.05  | 0.01  | -0.03 |
| 27 | 1 | 0.01  | 0.00  | 0.00  | 0.00  | 0.00  | 0.00  | 0.03  | -0.01 | 0.00  |
| 28 | 1 | 0.04  | 0.05  | 0.00  | -0.01 | -0.01 | 0.00  | 0.00  | 0.01  | -0.05 |
| 29 | 1 | 0.12  | -0.04 | 0.00  | -0.02 | 0.01  | 0.00  | 0.01  | -0.03 | 0.00  |
| 30 | 1 | 0.09  | 0.00  | -0.12 | -0.01 | 0.00  | 0.02  | 0.01  | -0.01 | -0.02 |
| 31 | 1 | 0.00  | 0.01  | 0.00  | 0.02  | 0.05  | 0.04  | 0.00  | 0.00  | 0.00  |
| 32 | 1 | 0.00  | 0.00  | 0.00  | -0.01 | -0.02 | -0.01 | 0.00  | 0.00  | 0.00  |
| 33 | 1 | 0.00  | 0.00  | 0.00  | 0.00  | -0.01 | -0.01 | 0.00  | 0.00  | 0.00  |
| 34 | 1 | -0.01 | 0.00  | 0.00  | -0.03 | 0.01  | 0.01  | 0.00  | 0.00  | 0.00  |
| 35 | 1 | 0.02  | -0.01 | -0.01 | 0.11  | -0.04 | -0.06 | 0.00  | 0.00  | 0.00  |
| 36 | 1 | -0.01 | -0.02 | -0.01 | -0.03 | -0.08 | -0.09 | 0.00  | 0.00  | 0.00  |
| 37 | 1 | -0.01 | 0.01  | 0.00  | -0.02 | 0.03  | -0.01 | 0.00  | 0.00  | 0.00  |
| 38 | 1 | -0.01 | -0.02 | -0.01 | -0.05 | -0.10 | -0.05 | 0.00  | 0.00  | 0.00  |
| 39 | 1 | 0.02  | -0.02 | 0.01  | 0.07  | -0.11 | 0.05  | 0.00  | 0.00  | 0.00  |
| 40 | 1 | 0.00  | -0.01 | -0.01 | 0.02  | 0.01  | -0.07 | 0.00  | 0.00  | 0.00  |
| 41 | 1 | -0.01 | -0.07 | 0.03  | -0.01 | 0.04  | -0.03 | 0.00  | 0.00  | 0.00  |
| 42 | 1 | -0.02 | 0.01  | 0.08  | 0.03  | -0.02 | 0.00  | 0.00  | 0.00  | 0.00  |
| 43 | 1 | 0.00  | 0.00  | 0.00  | 0.01  | 0.00  | 0.00  | -0.04 | 0.14  | 0.04  |
| 44 | 1 | 0.00  | 0.00  | 0.00  | 0.00  | 0.00  | 0.01  | 0.03  | 0.15  | 0.02  |
| 45 | 1 | 0.00  | 0.00  | 0.00  | 0.00  | 0.00  | 0.00  | -0.07 | 0.17  | -0.14 |

**Table S9.** B3LYP/6-31+G(d) Optimized cartesian coordinates, energies, and calculated frequencies of carbonyl groups in acetonitrile for *N*-Boc-L-alanine-L-proline-OMe **9**

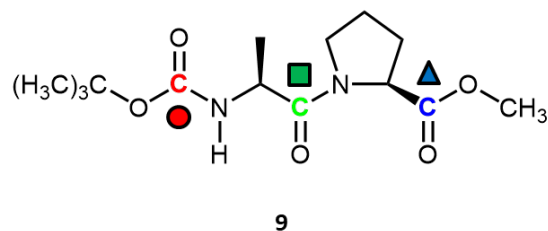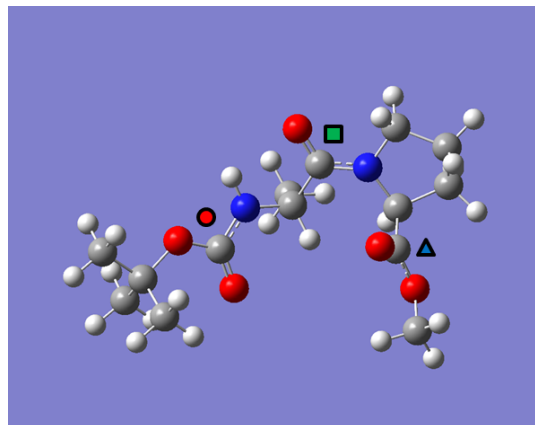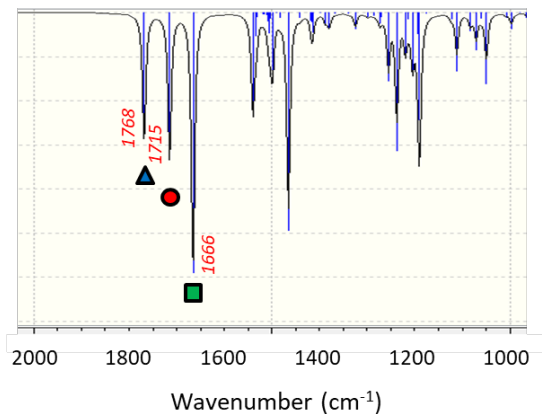

Zero-point correction = 0.383113 (Hartree/Particle)  
 Thermal correction to Energy = 0.406675  
 Thermal correction to Enthalpy = 0.407619  
 Thermal correction to Gibbs Free Energy = 0.328105  
 Sum of electronic and zero-point Energies = -1033.300055  
 Sum of electronic and thermal Energies = -1033.276492  
 Sum of electronic and thermal Enthalpies = -1033.275548  
 Sum of electronic and thermal Free Energies = -1033.355062

| Center<br>Number | Atomic<br>Number | Atomic<br>Type | Coordinates (Angstroms) |           |           |
|------------------|------------------|----------------|-------------------------|-----------|-----------|
|                  |                  |                | X                       | Y         | Z         |
| 1                | 7                | 0              | 2.386655                | -1.115566 | -0.164023 |
| 2                | 6                | 0              | 2.907243                | 0.076446  | 0.510024  |
| 3                | 6                | 0              | 4.441664                | -0.131822 | 0.440916  |
| 4                | 6                | 0              | 4.638669                | -0.883188 | -0.885152 |
| 5                | 6                | 0              | 3.418625                | -1.810437 | -0.966244 |
| 6                | 6                | 0              | -2.199832               | -0.144656 | 0.352798  |
| 7                | 8                | 0              | -2.103902               | 0.886952  | 1.016890  |
| 8                | 8                | 0              | -3.295255               | -0.548061 | -0.333403 |
| 9                | 6                | 0              | -4.548609               | 0.239604  | -0.361361 |
| 10               | 6                | 0              | -5.455594               | -0.618713 | -1.247642 |
| 11               | 6                | 0              | -5.129746               | 0.357398  | 1.051096  |
| 12               | 6                | 0              | -4.298146               | 1.605099  | -1.009112 |
| 13               | 6                | 0              | 2.489909                | 1.369807  | -0.202620 |
| 14               | 8                | 0              | 2.031730                | 1.437748  | -1.327735 |

|    |   |   |           |           |           |
|----|---|---|-----------|-----------|-----------|
| 15 | 7 | 0 | -1.201322 | -1.052383 | 0.201650  |
| 16 | 1 | 0 | -1.352706 | -1.874118 | -0.371660 |
| 17 | 6 | 0 | 0.109319  | -0.899472 | 0.811457  |
| 18 | 6 | 0 | 0.167995  | -1.527592 | 2.220106  |
| 19 | 1 | 0 | 0.307285  | 0.171685  | 0.886220  |
| 20 | 6 | 0 | 1.123751  | -1.593150 | -0.113336 |
| 21 | 8 | 0 | 0.780778  | -2.602300 | -0.750388 |
| 22 | 8 | 0 | 2.721600  | 2.428598  | 0.584879  |
| 23 | 6 | 0 | 2.423499  | 3.733725  | 0.032815  |
| 24 | 1 | 0 | 2.571944  | 0.134807  | 1.547873  |
| 25 | 1 | 0 | 4.991004  | 0.810872  | 0.499314  |
| 26 | 1 | 0 | 4.744460  | -0.755120 | 1.289044  |
| 27 | 1 | 0 | 4.638556  | -0.180725 | -1.725723 |
| 28 | 1 | 0 | 5.578722  | -1.440742 | -0.913224 |
| 29 | 1 | 0 | 3.058840  | -1.964980 | -1.986692 |
| 30 | 1 | 0 | 3.614819  | -2.794034 | -0.523355 |
| 31 | 1 | 0 | -6.433813 | -0.137939 | -1.353712 |
| 32 | 1 | 0 | -5.020278 | -0.741170 | -2.245376 |
| 33 | 1 | 0 | -5.603599 | -1.610792 | -0.807281 |
| 34 | 1 | 0 | -5.241704 | -0.634581 | 1.503399  |
| 35 | 1 | 0 | -4.497782 | 0.971767  | 1.695595  |
| 36 | 1 | 0 | -6.122434 | 0.818725  | 0.995480  |
| 37 | 1 | 0 | -3.833571 | 1.482556  | -1.994147 |
| 38 | 1 | 0 | -5.255596 | 2.120484  | -1.147456 |
| 39 | 1 | 0 | -3.653497 | 2.230725  | -0.388486 |
| 40 | 1 | 0 | 1.155165  | -1.398700 | 2.677847  |
| 41 | 1 | 0 | -0.574892 | -1.047420 | 2.864202  |
| 42 | 1 | 0 | -0.051914 | -2.598986 | 2.165459  |
| 43 | 1 | 0 | 3.029306  | 3.909848  | -0.858739 |
| 44 | 1 | 0 | 1.362154  | 3.799901  | -0.215851 |
| 45 | 1 | 0 | 2.680110  | 4.441777  | 0.819479  |

|               |    |           |       |       |           |       |       |           |       |       |
|---------------|----|-----------|-------|-------|-----------|-------|-------|-----------|-------|-------|
| Frequencies — |    | 1665.4993 |       |       | 1714.6954 |       |       | 1768.1388 |       |       |
| Red. masses — |    | 10.1152   |       |       | 10.3079   |       |       | 11.0834   |       |       |
| Frc consts —  |    | 16.5315   |       |       | 17.8564   |       |       | 20.4153   |       |       |
| IR Inten —    |    | 879.5226  |       |       | 491.5088  |       |       | 437.2905  |       |       |
| Atom          | AN | X         | Y     | Z     | X         | Y     | Z     | X         | Y     | Z     |
| 1             | 7  | -0.08     | -0.08 | -0.03 | 0.01      | 0.02  | 0.01  | -0.01     | -0.01 | 0.00  |
| 2             | 6  | -0.02     | -0.02 | 0.00  | 0.01      | 0.00  | 0.00  | -0.01     | 0.03  | -0.05 |
| 3             | 6  | 0.00      | 0.01  | 0.00  | 0.00      | 0.00  | 0.00  | -0.01     | 0.00  | 0.00  |
| 4             | 6  | 0.00      | -0.01 | -0.01 | 0.00      | 0.00  | 0.00  | 0.00      | 0.00  | 0.00  |
| 5             | 6  | -0.01     | 0.02  | 0.02  | 0.00      | -0.01 | -0.01 | 0.00      | 0.00  | 0.00  |
| 6             | 6  | -0.02     | 0.12  | 0.07  | -0.03     | 0.64  | 0.38  | 0.00      | -0.01 | -0.01 |
| 7             | 8  | 0.00      | -0.07 | -0.05 | -0.02     | -0.35 | -0.22 | 0.00      | 0.01  | 0.00  |
| 8             | 8  | 0.00      | -0.01 | -0.01 | -0.01     | -0.05 | -0.03 | 0.00      | 0.00  | 0.00  |
| 9             | 6  | 0.00      | 0.01  | 0.00  | -0.01     | 0.04  | 0.02  | 0.00      | 0.00  | 0.00  |
| 10            | 6  | 0.00      | 0.00  | 0.00  | 0.00      | -0.01 | 0.00  | 0.00      | 0.00  | 0.00  |
| 11            | 6  | 0.00      | 0.00  | 0.00  | 0.00      | 0.00  | 0.00  | 0.00      | 0.00  | 0.00  |
| 12            | 6  | 0.00      | 0.00  | 0.00  | 0.00      | 0.00  | 0.00  | 0.00      | 0.00  | 0.00  |
| 13            | 6  | -0.01     | 0.00  | -0.03 | 0.01      | 0.00  | 0.02  | 0.29      | -0.08 | 0.71  |

|    |   |       |       |       |       |       |       |       |       |       |
|----|---|-------|-------|-------|-------|-------|-------|-------|-------|-------|
| 14 | 8 | 0.01  | 0.00  | 0.02  | 0.00  | 0.00  | -0.01 | -0.18 | 0.04  | -0.45 |
| 15 | 7 | 0.02  | -0.02 | 0.00  | 0.05  | -0.10 | -0.04 | 0.00  | 0.00  | 0.00  |
| 16 | 1 | -0.16 | 0.03  | -0.02 | 0.29  | -0.18 | 0.01  | -0.01 | 0.00  | 0.00  |
| 17 | 6 | -0.02 | -0.03 | -0.01 | 0.02  | 0.02  | 0.02  | 0.00  | 0.00  | 0.00  |
| 18 | 6 | 0.00  | 0.00  | -0.01 | -0.01 | -0.01 | 0.00  | 0.00  | 0.00  | 0.00  |
| 19 | 1 | 0.28  | -0.07 | -0.21 | -0.13 | 0.07  | 0.01  | 0.03  | -0.01 | 0.01  |
| 20 | 6 | 0.26  | 0.59  | 0.35  | -0.05 | -0.11 | -0.07 | 0.02  | 0.02  | 0.01  |
| 21 | 8 | -0.11 | -0.34 | -0.22 | 0.02  | 0.06  | 0.04  | -0.01 | -0.02 | -0.01 |
| 22 | 8 | 0.00  | 0.01  | 0.00  | 0.00  | 0.00  | 0.00  | -0.02 | -0.01 | -0.05 |
| 23 | 6 | 0.00  | 0.00  | 0.00  | 0.00  | 0.00  | 0.00  | 0.01  | -0.03 | 0.02  |
| 24 | 1 | 0.07  | 0.10  | 0.01  | -0.01 | -0.02 | 0.00  | -0.11 | 0.20  | -0.07 |
| 25 | 1 | 0.03  | -0.01 | 0.00  | -0.01 | 0.00  | 0.00  | 0.00  | -0.01 | 0.01  |
| 26 | 1 | 0.00  | 0.00  | 0.00  | 0.00  | 0.00  | 0.00  | 0.05  | 0.00  | -0.03 |
| 27 | 1 | 0.01  | 0.00  | 0.01  | 0.00  | 0.00  | 0.00  | 0.03  | -0.01 | 0.00  |
| 28 | 1 | 0.04  | 0.06  | 0.00  | -0.01 | -0.01 | 0.00  | 0.00  | 0.00  | -0.04 |
| 29 | 1 | 0.12  | -0.06 | 0.01  | -0.02 | 0.01  | 0.00  | 0.01  | -0.02 | 0.00  |
| 30 | 1 | 0.09  | -0.01 | -0.14 | -0.02 | 0.00  | 0.03  | 0.01  | -0.01 | -0.02 |
| 31 | 1 | 0.00  | 0.01  | 0.01  | 0.02  | 0.05  | 0.04  | 0.00  | 0.00  | 0.00  |
| 32 | 1 | 0.00  | 0.00  | 0.00  | 0.00  | -0.02 | -0.01 | 0.00  | 0.00  | 0.00  |
| 33 | 1 | 0.00  | 0.00  | 0.00  | 0.00  | -0.02 | -0.01 | 0.00  | 0.00  | 0.00  |
| 34 | 1 | -0.01 | 0.00  | 0.00  | -0.03 | 0.01  | 0.01  | 0.00  | 0.00  | 0.00  |
| 35 | 1 | 0.03  | -0.01 | -0.01 | 0.11  | -0.04 | -0.06 | 0.00  | 0.00  | 0.00  |
| 36 | 1 | -0.01 | -0.02 | -0.02 | -0.03 | -0.07 | -0.09 | 0.00  | 0.00  | 0.00  |
| 37 | 1 | -0.01 | 0.01  | 0.00  | -0.02 | 0.03  | -0.01 | 0.00  | 0.00  | 0.00  |
| 38 | 1 | -0.01 | -0.02 | -0.02 | -0.05 | -0.10 | -0.05 | 0.00  | 0.00  | 0.00  |
| 39 | 1 | 0.02  | -0.03 | 0.01  | 0.07  | -0.10 | 0.05  | 0.00  | 0.00  | 0.00  |
| 40 | 1 | 0.00  | -0.01 | -0.01 | 0.03  | 0.01  | -0.07 | 0.00  | 0.00  | 0.00  |
| 41 | 1 | -0.01 | -0.07 | 0.03  | -0.02 | 0.03  | -0.02 | 0.00  | 0.00  | 0.00  |
| 42 | 1 | -0.02 | 0.01  | 0.08  | 0.02  | -0.02 | 0.01  | 0.00  | 0.00  | 0.00  |
| 43 | 1 | -0.01 | 0.00  | 0.00  | 0.00  | 0.00  | 0.00  | -0.04 | 0.15  | 0.04  |
| 44 | 1 | 0.00  | 0.00  | -0.01 | 0.00  | 0.00  | 0.00  | 0.04  | 0.15  | 0.01  |
| 45 | 1 | 0.00  | 0.00  | 0.00  | 0.00  | 0.00  | 0.00  | -0.07 | 0.18  | -0.14 |

**Table S10.** B3LYP/6-31+G(d) Optimized cartesian coordinates, energies, and calculated frequencies of carbonyl groups in the gas phase for *N*-Boc-L-serine-L-proline-OMe **10**

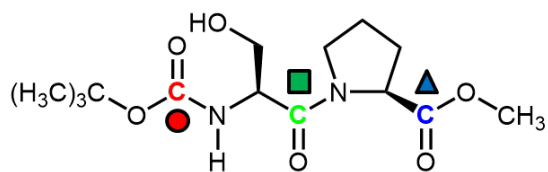

**10**

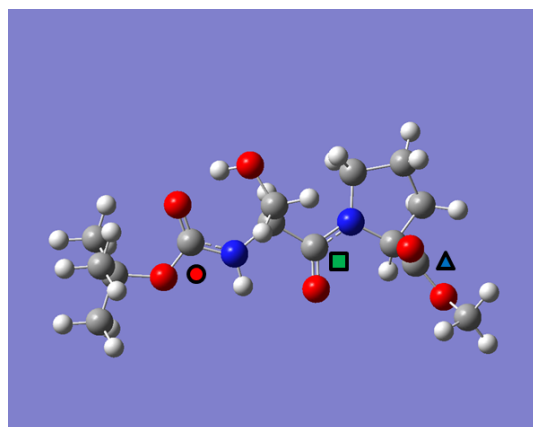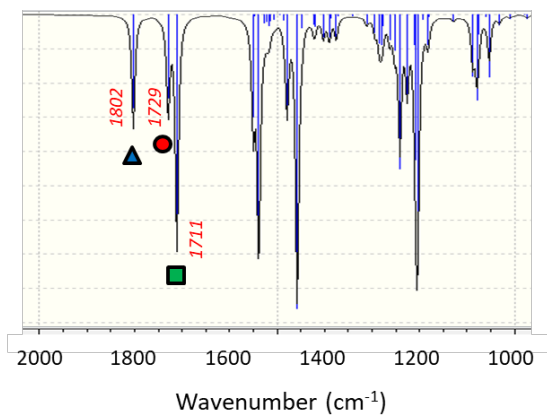

Zero-point correction = 0.389722 (Hartree/Particle)  
 Thermal correction to Energy = 0.413794  
 Thermal correction to Enthalpy = 0.414738  
 Thermal correction to Gibbs Free Energy = 0.334033  
 Sum of electronic and zero-point Energies = -1108.494680  
 Sum of electronic and thermal Energies = -1108.470608  
 Sum of electronic and thermal Enthalpies = -1108.469663  
 Sum of electronic and thermal Free Energies = -1108.550368

| Center<br>Number | Atomic<br>Number | Atomic<br>Type | Coordinates (Angstroms) |           |           |
|------------------|------------------|----------------|-------------------------|-----------|-----------|
|                  |                  |                | X                       | Y         | Z         |
| 1                | 7                | 0              | 2.061296                | 0.554991  | -0.627909 |
| 2                | 6                | 0              | 3.298797                | -0.143380 | -0.976054 |
| 3                | 6                | 0              | 4.198516                | 0.987202  | -1.530189 |
| 4                | 6                | 0              | 3.716625                | 2.234897  | -0.770721 |
| 5                | 6                | 0              | 2.199516                | 2.025554  | -0.657867 |
| 6                | 6                | 0              | -2.725791               | 0.158632  | -0.020824 |
| 7                | 8                | 0              | -3.056368               | 1.272088  | 0.395853  |
| 8                | 8                | 0              | -3.575818               | -0.824508 | -0.385097 |
| 9                | 6                | 0              | -5.040746               | -0.678897 | -0.256696 |
| 10               | 6                | 0              | -5.424302               | -0.463704 | 1.211405  |
| 11               | 6                | 0              | -5.536929               | 0.452795  | -1.163004 |
| 12               | 6                | 0              | -5.548216               | -2.035055 | -0.754934 |
| 13               | 6                | 0              | 3.922403                | -0.803159 | 0.257891  |

|    |   |   |           |           |           |
|----|---|---|-----------|-----------|-----------|
| 14 | 8 | 0 | 3.779441  | -0.424353 | 1.401199  |
| 15 | 7 | 0 | -1.441247 | -0.240751 | -0.184183 |
| 16 | 1 | 0 | -1.234195 | -1.205310 | -0.423371 |
| 17 | 6 | 0 | -0.299218 | 0.617598  | 0.087001  |
| 18 | 6 | 0 | -0.191753 | 1.055791  | 1.582650  |
| 19 | 1 | 0 | -0.388829 | 1.534986  | -0.507360 |
| 20 | 8 | 0 | -0.853186 | 2.280322  | 1.831527  |
| 21 | 6 | 0 | 0.945896  | -0.165580 | -0.346020 |
| 22 | 8 | 0 | 0.930989  | -1.399060 | -0.411901 |
| 23 | 8 | 0 | 4.704497  | -1.836638 | -0.105672 |
| 24 | 6 | 0 | 5.381160  | -2.526756 | 0.964531  |
| 25 | 1 | 0 | 3.103536  | -0.923645 | -1.715319 |
| 26 | 1 | 0 | 5.263407  | 0.778266  | -1.393739 |
| 27 | 1 | 0 | 4.013898  | 1.092486  | -2.605804 |
| 28 | 1 | 0 | 4.162465  | 2.266087  | 0.229022  |
| 29 | 1 | 0 | 3.965328  | 3.168433  | -1.284503 |
| 30 | 1 | 0 | 1.779935  | 2.486583  | 0.239225  |
| 31 | 1 | 0 | 1.673464  | 2.434904  | -1.531769 |
| 32 | 1 | 0 | -6.515741 | -0.499768 | 1.309646  |
| 33 | 1 | 0 | -5.002041 | -1.257981 | 1.837661  |
| 34 | 1 | 0 | -5.074939 | 0.502455  | 1.581015  |
| 35 | 1 | 0 | -6.633294 | 0.469332  | -1.156438 |
| 36 | 1 | 0 | -5.170830 | 1.423968  | -0.824384 |
| 37 | 1 | 0 | -5.206555 | 0.288246  | -2.195070 |
| 38 | 1 | 0 | -5.232311 | -2.211167 | -1.788773 |
| 39 | 1 | 0 | -5.159589 | -2.847843 | -0.132062 |
| 40 | 1 | 0 | -6.642792 | -2.061014 | -0.716831 |
| 41 | 1 | 0 | -0.589763 | 0.237991  | 2.201560  |
| 42 | 1 | 0 | 0.853902  | 1.205611  | 1.866528  |
| 43 | 1 | 0 | -1.764032 | 2.184892  | 1.484303  |
| 44 | 1 | 0 | 5.942565  | -3.326513 | 0.481392  |
| 45 | 1 | 0 | 6.053031  | -1.844270 | 1.491883  |
| 46 | 1 | 0 | 4.650872  | -2.934837 | 1.667540  |

|                |           |       |       |       |           |       |       |       |           |       |  |  |
|----------------|-----------|-------|-------|-------|-----------|-------|-------|-------|-----------|-------|--|--|
| Frequencies -- | 1710.6395 |       |       |       | 1729.1347 |       |       |       | 1802.3532 |       |  |  |
| Red. masses -- | 10.6825   |       |       |       | 8.8962    |       |       |       | 10.9353   |       |  |  |
| Frc consts --  | 18.4179   |       |       |       | 15.6716   |       |       |       | 20.9296   |       |  |  |
| IR Inten --    | 394.0436  |       |       |       | 165.0304  |       |       |       | 191.8545  |       |  |  |
| Atom           | AN        | X     | Y     | Z     | X         | Y     | Z     | X     | Y         | Z     |  |  |
| 1              | 7         | -0.05 | -0.12 | 0.01  | 0.01      | 0.04  | 0.00  | 0.01  | 0.00      | 0.00  |  |  |
| 2              | 6         | -0.02 | 0.03  | 0.00  | 0.01      | -0.01 | 0.00  | -0.02 | -0.01     | -0.06 |  |  |
| 3              | 6         | 0.01  | -0.01 | 0.00  | 0.00      | 0.00  | 0.00  | 0.01  | 0.01      | 0.00  |  |  |
| 4              | 6         | 0.00  | 0.01  | 0.00  | 0.00      | 0.00  | 0.00  | 0.00  | 0.00      | 0.00  |  |  |
| 5              | 6         | -0.02 | -0.01 | 0.00  | 0.01      | 0.00  | 0.00  | 0.00  | 0.00      | 0.00  |  |  |
| 6              | 6         | -0.11 | 0.20  | 0.08  | -0.26     | 0.58  | 0.22  | 0.00  | 0.01      | 0.00  |  |  |
| 7              | 8         | 0.04  | -0.12 | -0.05 | 0.10      | -0.32 | -0.12 | 0.00  | 0.00      | 0.00  |  |  |
| 8              | 8         | 0.00  | -0.02 | -0.01 | 0.01      | -0.06 | -0.02 | 0.00  | 0.00      | 0.00  |  |  |
| 9              | 6         | -0.01 | 0.01  | 0.01  | -0.03     | 0.03  | 0.02  | 0.00  | 0.00      | 0.00  |  |  |
| 10             | 6         | 0.00  | 0.00  | 0.00  | 0.00      | 0.00  | 0.00  | 0.00  | 0.00      | 0.00  |  |  |
| 11             | 6         | 0.00  | 0.00  | 0.00  | 0.00      | 0.01  | 0.00  | 0.00  | 0.00      | 0.00  |  |  |
| 12             | 6         | 0.00  | 0.00  | 0.00  | 0.01      | -0.01 | 0.00  | 0.00  | 0.00      | 0.00  |  |  |

|    |   |       |       |       |       |       |       |       |       |       |
|----|---|-------|-------|-------|-------|-------|-------|-------|-------|-------|
| 13 | 6 | 0.00  | 0.02  | 0.03  | 0.00  | -0.01 | -0.01 | -0.07 | 0.22  | 0.72  |
| 14 | 8 | 0.00  | -0.01 | -0.02 | 0.00  | 0.00  | 0.01  | 0.05  | -0.14 | -0.46 |
| 15 | 7 | 0.06  | -0.01 | 0.00  | 0.08  | -0.08 | -0.03 | 0.00  | 0.00  | 0.00  |
| 16 | 1 | -0.19 | -0.06 | -0.02 | 0.39  | 0.00  | -0.04 | 0.01  | 0.00  | 0.00  |
| 17 | 6 | -0.01 | -0.04 | 0.01  | 0.02  | 0.02  | 0.00  | 0.00  | 0.00  | 0.00  |
| 18 | 6 | 0.00  | -0.01 | -0.01 | -0.03 | 0.02  | 0.01  | 0.00  | 0.00  | 0.00  |
| 19 | 1 | 0.23  | -0.09 | -0.14 | -0.19 | 0.03  | 0.01  | -0.01 | 0.00  | 0.00  |
| 20 | 8 | 0.00  | 0.00  | 0.00  | 0.01  | 0.00  | 0.00  | 0.00  | 0.00  | 0.00  |
| 21 | 6 | 0.06  | 0.72  | 0.02  | -0.02 | -0.21 | -0.01 | 0.00  | -0.04 | 0.00  |
| 22 | 8 | 0.00  | -0.42 | -0.02 | 0.00  | 0.12  | 0.01  | 0.00  | 0.02  | 0.00  |
| 23 | 8 | 0.00  | -0.01 | 0.00  | 0.00  | 0.00  | 0.00  | 0.02  | -0.03 | -0.04 |
| 24 | 6 | 0.00  | 0.00  | 0.00  | 0.00  | 0.00  | 0.00  | 0.01  | -0.01 | 0.03  |
| 25 | 1 | 0.09  | 0.03  | -0.01 | -0.03 | -0.01 | 0.00  | -0.10 | 0.17  | -0.18 |
| 26 | 1 | 0.02  | 0.05  | -0.02 | -0.01 | -0.02 | 0.01  | 0.00  | 0.00  | 0.03  |
| 27 | 1 | -0.01 | 0.00  | 0.00  | 0.00  | 0.00  | 0.00  | -0.05 | -0.04 | 0.00  |
| 28 | 1 | 0.00  | -0.01 | 0.00  | 0.00  | 0.00  | 0.00  | -0.01 | -0.05 | 0.02  |
| 29 | 1 | 0.01  | 0.00  | -0.01 | -0.01 | 0.00  | 0.00  | -0.01 | -0.03 | -0.05 |
| 30 | 1 | 0.02  | 0.11  | -0.04 | -0.01 | -0.03 | 0.01  | 0.02  | -0.02 | 0.02  |
| 31 | 1 | 0.04  | 0.15  | 0.05  | -0.01 | -0.05 | -0.02 | 0.00  | -0.03 | -0.01 |
| 32 | 1 | 0.00  | -0.04 | -0.02 | 0.00  | -0.10 | -0.07 | 0.00  | 0.00  | 0.00  |
| 33 | 1 | -0.01 | 0.00  | 0.01  | -0.03 | 0.00  | 0.02  | 0.00  | 0.00  | 0.00  |
| 34 | 1 | 0.05  | 0.00  | -0.03 | 0.12  | -0.01 | -0.07 | 0.00  | 0.00  | 0.00  |
| 35 | 1 | 0.00  | -0.04 | -0.01 | 0.00  | -0.12 | -0.02 | 0.00  | 0.00  | 0.00  |
| 36 | 1 | 0.05  | -0.02 | 0.01  | 0.13  | -0.05 | 0.04  | 0.00  | 0.00  | 0.00  |
| 37 | 1 | -0.01 | 0.01  | 0.00  | -0.03 | 0.02  | -0.01 | 0.00  | 0.00  | 0.00  |
| 38 | 1 | 0.00  | 0.00  | 0.00  | 0.00  | -0.02 | 0.00  | 0.00  | 0.00  | 0.00  |
| 39 | 1 | 0.00  | -0.01 | 0.00  | 0.00  | -0.02 | -0.01 | 0.00  | 0.00  | 0.00  |
| 40 | 1 | 0.00  | 0.01  | 0.01  | 0.00  | 0.05  | 0.02  | 0.00  | 0.00  | 0.00  |
| 41 | 1 | -0.01 | 0.03  | 0.03  | 0.04  | -0.03 | -0.01 | 0.00  | 0.00  | 0.00  |
| 42 | 1 | 0.00  | 0.00  | -0.02 | -0.01 | -0.04 | -0.05 | 0.01  | -0.02 | 0.00  |
| 43 | 1 | 0.03  | -0.07 | -0.02 | 0.11  | -0.21 | -0.07 | 0.00  | 0.01  | 0.00  |
| 44 | 1 | 0.00  | 0.00  | -0.01 | 0.00  | 0.00  | 0.00  | -0.08 | 0.07  | -0.20 |
| 45 | 1 | -0.01 | 0.00  | 0.01  | 0.00  | 0.00  | 0.00  | -0.07 | 0.13  | -0.02 |
| 46 | 1 | 0.01  | 0.01  | 0.01  | 0.00  | 0.00  | 0.00  | -0.11 | 0.10  | -0.01 |



**Table S11.** B3LYP/6-31+G(d) Optimized cartesian coordinates, energies, and calculated frequencies of carbonyl groups in chloroform for *N*-Boc-L-serine-L-proline-OMe **10**



**10**

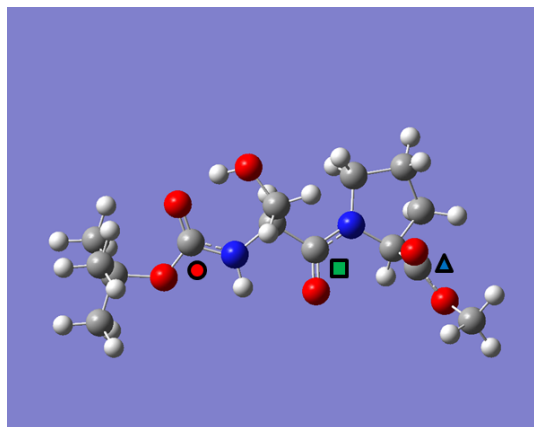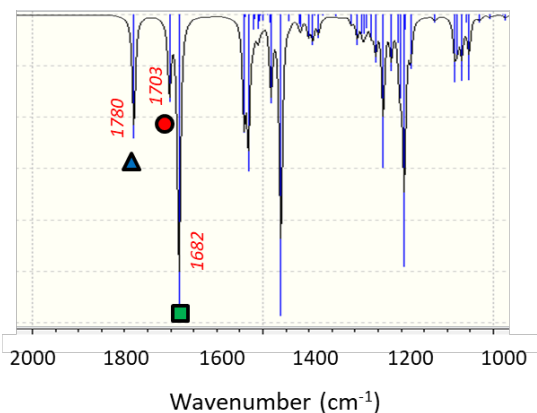

Zero-point correction = 0.389060 (Hartree/Particle)  
 Thermal correction to Energy = 0.413192  
 Thermal correction to Enthalpy = 0.414136  
 Thermal correction to Gibbs Free Energy = 0.333342  
 Sum of electronic and zero-point Energies = -1108.508158  
 Sum of electronic and thermal Energies = -1108.484026  
 Sum of electronic and thermal Enthalpies = -1108.483082  
 Sum of electronic and thermal Free Energies = -1108.563877

| Center Number | Atomic Number | Atomic Type | Coordinates (Angstroms) |           |           |
|---------------|---------------|-------------|-------------------------|-----------|-----------|
|               |               |             | X                       | Y         | Z         |
| 1             | 7             | 0           | -2.050107               | -0.544779 | -0.587138 |
| 2             | 6             | 0           | -3.273946               | 0.166937  | -0.965050 |
| 3             | 6             | 0           | -4.146076               | -0.938109 | -1.610890 |
| 4             | 6             | 0           | -3.682387               | -2.223930 | -0.907852 |
| 5             | 6             | 0           | -2.173170               | -2.013218 | -0.729600 |
| 6             | 6             | 0           | 2.733004                | -0.167295 | -0.006001 |
| 7             | 8             | 0           | 3.086324                | -1.300764 | 0.342266  |
| 8             | 8             | 0           | 3.559565                | 0.828916  | -0.374482 |
| 9             | 6             | 0           | 5.036002                | 0.707484  | -0.294149 |
| 10            | 6             | 0           | 5.463538                | 0.447442  | 1.153468  |
| 11            | 6             | 0           | 5.523374                | -0.378686 | -1.257664 |
| 12            | 6             | 0           | 5.501720                | 2.090646  | -0.755828 |
| 13            | 6             | 0           | -3.958250               | 0.785891  | 0.256359  |

|    |   |   |           |           |           |
|----|---|---|-----------|-----------|-----------|
| 14 | 8 | 0 | -3.856715 | 0.383827  | 1.399080  |
| 15 | 7 | 0 | 1.441668  | 0.235504  | -0.073868 |
| 16 | 1 | 0 | 1.228589  | 1.207624  | -0.273012 |
| 17 | 6 | 0 | 0.301146  | -0.639209 | 0.162550  |
| 18 | 6 | 0 | 0.191199  | -1.117460 | 1.639516  |
| 19 | 1 | 0 | 0.395673  | -1.531434 | -0.467095 |
| 20 | 8 | 0 | 0.985632  | -2.266245 | 1.895203  |
| 21 | 6 | 0 | -0.947678 | 0.158181  | -0.244245 |
| 22 | 8 | 0 | -0.933988 | 1.397785  | -0.232487 |
| 23 | 8 | 0 | -4.736556 | 1.814265  | -0.116274 |
| 24 | 6 | 0 | -5.497631 | 2.462967  | 0.927701  |
| 25 | 1 | 0 | -3.044778 | 0.971963  | -1.666841 |
| 26 | 1 | 0 | -5.216077 | -0.743374 | -1.499297 |
| 27 | 1 | 0 | -3.923098 | -0.980585 | -2.682713 |
| 28 | 1 | 0 | -4.164107 | -2.319731 | 0.070973  |
| 29 | 1 | 0 | -3.902685 | -3.125591 | -1.486089 |
| 30 | 1 | 0 | -1.780731 | -2.531818 | 0.147615  |
| 31 | 1 | 0 | -1.615119 | -2.350276 | -1.612862 |
| 32 | 1 | 0 | 6.555952  | 0.504132  | 1.221821  |
| 33 | 1 | 0 | 5.042788  | 1.208615  | 1.820302  |
| 34 | 1 | 0 | 5.147257  | -0.539482 | 1.497396  |
| 35 | 1 | 0 | 6.619242  | -0.373146 | -1.283166 |
| 36 | 1 | 0 | 5.187456  | -1.369680 | -0.946371 |
| 37 | 1 | 0 | 5.159462  | -0.181552 | -2.272471 |
| 38 | 1 | 0 | 5.153183  | 2.297978  | -1.773255 |
| 39 | 1 | 0 | 5.119589  | 2.872232  | -0.090477 |
| 40 | 1 | 0 | 6.596035  | 2.134053  | -0.748857 |
| 41 | 1 | 0 | 0.472114  | -0.277376 | 2.290786  |
| 42 | 1 | 0 | -0.839322 | -1.395959 | 1.877153  |
| 43 | 1 | 0 | 1.863465  | -2.107357 | 1.485235  |
| 44 | 1 | 0 | -6.046957 | 3.260361  | 0.428391  |
| 45 | 1 | 0 | -6.185086 | 1.750928  | 1.390680  |
| 46 | 1 | 0 | -4.822921 | 2.872271  | 1.682864  |

|                |    |           |       |       |           |       |       |           |       |       |
|----------------|----|-----------|-------|-------|-----------|-------|-------|-----------|-------|-------|
| Frequencies -- |    | 1681.8910 |       |       | 1702.5880 |       |       | 1779.7434 |       |       |
| Red. masses -- |    | 10.3009   |       |       | 8.5131    |       |       | 10.9462   |       |       |
| Frc consts --  |    | 17.1681   |       |       | 14.5398   |       |       | 20.4281   |       |       |
| IR Inten --    |    | 742.6573  |       |       | 216.3966  |       |       | 322.6177  |       |       |
| Atom           | AN | X         | Y     | Z     | X         | Y     | Z     | X         | Y     | Z     |
| 1              | 7  | -0.06     | -0.12 | -0.03 | 0.02      | 0.05  | 0.01  | -0.01     | 0.00  | 0.00  |
| 2              | 6  | -0.02     | 0.03  | 0.00  | 0.01      | -0.01 | 0.00  | 0.02      | 0.01  | -0.06 |
| 3              | 6  | 0.01      | -0.01 | 0.00  | 0.00      | 0.01  | 0.00  | -0.01     | -0.01 | 0.00  |
| 4              | 6  | 0.00      | 0.01  | 0.00  | 0.00      | 0.00  | 0.00  | 0.00      | 0.00  | 0.00  |
| 5              | 6  | -0.02     | -0.01 | 0.00  | 0.01      | 0.01  | 0.00  | 0.00      | 0.00  | 0.00  |
| 6              | 6  | -0.14     | 0.27  | -0.08 | -0.25     | 0.55  | -0.17 | 0.00      | -0.01 | 0.00  |
| 7              | 8  | 0.06      | -0.16 | 0.05  | 0.10      | -0.30 | 0.09  | 0.00      | 0.00  | 0.00  |
| 8              | 8  | 0.00      | -0.03 | 0.01  | 0.01      | -0.05 | 0.02  | 0.00      | 0.00  | 0.00  |
| 9              | 6  | -0.01     | 0.02  | -0.01 | -0.03     | 0.03  | -0.01 | 0.00      | 0.00  | 0.00  |
| 10             | 6  | 0.00      | 0.00  | 0.00  | 0.00      | 0.00  | 0.00  | 0.00      | 0.00  | 0.00  |
| 11             | 6  | 0.00      | 0.00  | 0.00  | 0.00      | 0.00  | 0.00  | 0.00      | 0.00  | 0.00  |
| 12             | 6  | 0.00      | 0.00  | 0.00  | 0.01      | -0.01 | 0.00  | 0.00      | 0.00  | 0.00  |

|    |   |       |       |       |       |       |       |       |       |       |
|----|---|-------|-------|-------|-------|-------|-------|-------|-------|-------|
| 13 | 6 | 0.00  | 0.02  | -0.03 | 0.00  | -0.01 | 0.02  | 0.04  | -0.23 | 0.72  |
| 14 | 8 | 0.00  | -0.01 | 0.02  | 0.00  | 0.01  | -0.01 | -0.04 | 0.15  | -0.45 |
| 15 | 7 | 0.06  | -0.02 | 0.00  | 0.08  | -0.07 | 0.02  | 0.00  | 0.00  | 0.00  |
| 16 | 1 | -0.13 | -0.06 | 0.02  | 0.41  | 0.00  | 0.02  | -0.01 | 0.00  | 0.00  |
| 17 | 6 | -0.01 | -0.03 | -0.02 | 0.02  | 0.03  | 0.00  | 0.00  | 0.00  | 0.00  |
| 18 | 6 | -0.01 | -0.01 | 0.01  | -0.03 | 0.01  | -0.01 | 0.00  | 0.00  | 0.00  |
| 19 | 1 | 0.23  | -0.10 | 0.15  | -0.22 | 0.03  | -0.02 | 0.01  | -0.01 | 0.01  |
| 20 | 8 | 0.00  | 0.00  | 0.00  | 0.00  | 0.00  | 0.00  | 0.00  | 0.00  | 0.00  |
| 21 | 6 | 0.08  | 0.67  | 0.03  | -0.03 | -0.28 | -0.01 | 0.01  | 0.04  | 0.00  |
| 22 | 8 | 0.00  | -0.39 | 0.00  | 0.00  | 0.15  | 0.00  | 0.00  | -0.02 | 0.00  |
| 23 | 8 | 0.00  | -0.01 | 0.00  | 0.00  | 0.00  | 0.00  | -0.01 | 0.02  | -0.04 |
| 24 | 6 | 0.00  | 0.00  | 0.00  | 0.00  | 0.00  | 0.00  | -0.01 | 0.01  | 0.03  |
| 25 | 1 | 0.09  | 0.02  | 0.00  | -0.04 | -0.01 | 0.00  | 0.10  | -0.16 | -0.19 |
| 26 | 1 | 0.02  | 0.05  | 0.03  | -0.01 | -0.02 | -0.01 | -0.01 | 0.00  | 0.02  |
| 27 | 1 | 0.00  | 0.00  | 0.00  | 0.00  | 0.00  | 0.00  | 0.05  | 0.05  | 0.00  |
| 28 | 1 | 0.00  | -0.01 | 0.00  | 0.00  | 0.00  | 0.00  | 0.01  | 0.03  | 0.02  |
| 29 | 1 | 0.02  | 0.00  | 0.00  | -0.01 | 0.00  | 0.00  | 0.01  | 0.03  | -0.04 |
| 30 | 1 | 0.01  | 0.13  | 0.08  | 0.00  | -0.05 | -0.03 | -0.01 | 0.02  | 0.02  |
| 31 | 1 | 0.03  | 0.20  | -0.06 | -0.01 | -0.08 | 0.03  | 0.00  | 0.02  | -0.01 |
| 32 | 1 | 0.00  | -0.06 | 0.03  | 0.00  | -0.10 | 0.06  | 0.00  | 0.00  | 0.00  |
| 33 | 1 | -0.02 | 0.00  | -0.01 | -0.03 | 0.00  | -0.02 | 0.00  | 0.00  | 0.00  |
| 34 | 1 | 0.06  | 0.00  | 0.04  | 0.11  | 0.00  | 0.06  | 0.00  | 0.00  | 0.00  |
| 35 | 1 | 0.00  | -0.06 | 0.01  | 0.00  | -0.12 | 0.01  | 0.00  | 0.00  | 0.00  |
| 36 | 1 | 0.06  | -0.03 | -0.02 | 0.11  | -0.04 | -0.04 | 0.00  | 0.00  | 0.00  |
| 37 | 1 | -0.02 | 0.01  | 0.01  | -0.03 | 0.01  | 0.01  | 0.00  | 0.00  | 0.00  |
| 38 | 1 | 0.00  | -0.01 | 0.00  | 0.00  | -0.02 | 0.00  | 0.00  | 0.00  | 0.00  |
| 39 | 1 | 0.00  | -0.01 | 0.00  | 0.00  | -0.02 | 0.01  | 0.00  | 0.00  | 0.00  |
| 40 | 1 | 0.00  | 0.02  | -0.01 | 0.00  | 0.06  | -0.02 | 0.00  | 0.00  | 0.00  |
| 41 | 1 | 0.02  | 0.03  | -0.03 | 0.06  | -0.03 | 0.01  | 0.00  | 0.00  | 0.00  |
| 42 | 1 | -0.01 | -0.02 | 0.01  | 0.00  | -0.05 | 0.04  | -0.01 | 0.01  | 0.00  |
| 43 | 1 | 0.07  | -0.11 | 0.04  | 0.14  | -0.20 | 0.08  | 0.00  | 0.00  | 0.00  |
| 44 | 1 | 0.00  | 0.00  | 0.01  | 0.00  | 0.00  | 0.00  | 0.09  | -0.06 | -0.20 |
| 45 | 1 | -0.01 | 0.00  | 0.00  | 0.00  | 0.00  | 0.00  | 0.06  | -0.13 | -0.03 |
| 46 | 1 | 0.00  | 0.01  | -0.01 | 0.00  | 0.00  | 0.00  | 0.13  | -0.08 | -0.02 |

**Table S12.** B3LYP/6-31+G(d) Optimized cartesian coordinates, energies, and calculated frequencies of carbonyl groups in acetonitrile for *N*-Boc-L-serine-L-proline-OMe **10**



**10**

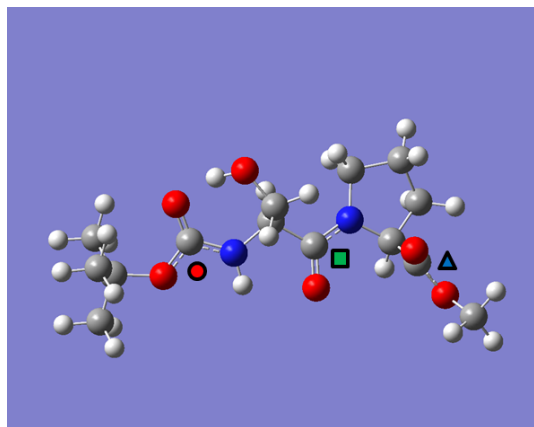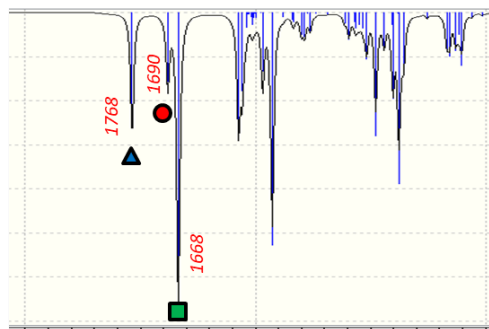

Zero-point correction = 0.388764 (Hartree/Particle)  
 Thermal correction to Energy = 0.412936  
 Thermal correction to Enthalpy = 0.413880  
 Thermal correction to Gibbs Free Energy = 0.332963  
 Sum of electronic and zero-point Energies = -1108.513725  
 Sum of electronic and thermal Energies = -1108.489553  
 Sum of electronic and thermal Enthalpies = -1108.488608  
 Sum of electronic and thermal Free Energies = -1108.569525

| Center Number | Atomic Number | Atomic Type | Coordinates (Angstroms) |           |           |
|---------------|---------------|-------------|-------------------------|-----------|-----------|
|               |               |             | X                       | Y         | Z         |
| 1             | 7             | 0           | -2.042660               | -0.540769 | -0.571914 |
| 2             | 6             | 0           | -3.261133               | 0.175677  | -0.961109 |
| 3             | 6             | 0           | -4.121856               | -0.918322 | -1.642057 |
| 4             | 6             | 0           | -3.657704               | -2.219959 | -0.969923 |
| 5             | 6             | 0           | -2.152552               | -2.005215 | -0.769372 |
| 6             | 6             | 0           | 2.732792                | -0.164485 | 0.009880  |
| 7             | 8             | 0           | 3.092359                | -1.306286 | 0.328652  |
| 8             | 8             | 0           | 3.550734                | 0.835925  | -0.359708 |
| 9             | 6             | 0           | 5.031496                | 0.718158  | -0.313366 |
| 10            | 6             | 0           | 5.489875                | 0.434503  | 1.119956  |
| 11            | 6             | 0           | 5.500044                | -0.348554 | -1.306860 |
| 12            | 6             | 0           | 5.481810                | 2.110909  | -0.760350 |
| 13            | 6             | 0           | -3.967910               | 0.779877  | 0.253872  |

|    |   |   |           |           |           |
|----|---|---|-----------|-----------|-----------|
| 14 | 8 | 0 | -3.879307 | 0.371966  | 1.397069  |
| 15 | 7 | 0 | 1.440691  | 0.239856  | -0.014635 |
| 16 | 1 | 0 | 1.224929  | 1.212801  | -0.205830 |
| 17 | 6 | 0 | 0.301969  | -0.644953 | 0.197083  |
| 18 | 6 | 0 | 0.188228  | -1.149133 | 1.662873  |
| 19 | 1 | 0 | 0.403038  | -1.522022 | -0.451981 |
| 20 | 8 | 0 | 1.028916  | -2.267967 | 1.916217  |
| 21 | 6 | 0 | -0.949853 | 0.155678  | -0.196479 |
| 22 | 8 | 0 | -0.942983 | 1.396250  | -0.141896 |
| 23 | 8 | 0 | -4.746797 | 1.804288  | -0.122665 |
| 24 | 6 | 0 | -5.543596 | 2.433617  | 0.908294  |
| 25 | 1 | 0 | -3.019456 | 0.989533  | -1.648511 |
| 26 | 1 | 0 | -5.193586 | -0.732224 | -1.534090 |
| 27 | 1 | 0 | -3.889047 | -0.931336 | -2.712131 |
| 28 | 1 | 0 | -4.150472 | -2.348676 | -0.000282 |
| 29 | 1 | 0 | -3.864461 | -3.105140 | -1.577410 |
| 30 | 1 | 0 | -1.764596 | -2.551010 | 0.092986  |
| 31 | 1 | 0 | -1.583690 | -2.303795 | -1.658803 |
| 32 | 1 | 0 | 6.582949  | 0.496958  | 1.166108  |
| 33 | 1 | 0 | 5.078789  | 1.180627  | 1.809366  |
| 34 | 1 | 0 | 5.187531  | -0.560802 | 1.452355  |
| 35 | 1 | 0 | 6.594802  | -0.337113 | -1.357201 |
| 36 | 1 | 0 | 5.176264  | -1.346651 | -1.005399 |
| 37 | 1 | 0 | 5.112092  | -0.135570 | -2.309395 |
| 38 | 1 | 0 | 5.110857  | 2.334560  | -1.766320 |
| 39 | 1 | 0 | 5.112753  | 2.879004  | -0.072266 |
| 40 | 1 | 0 | 6.575738  | 2.157368  | -0.776592 |
| 41 | 1 | 0 | 0.424689  | -0.309859 | 2.332226  |
| 42 | 1 | 0 | -0.833183 | -1.475694 | 1.877802  |
| 43 | 1 | 0 | 1.892770  | -2.086120 | 1.484556  |
| 44 | 1 | 0 | -6.093281 | 3.225655  | 0.401438  |
| 45 | 1 | 0 | -6.230849 | 1.706861  | 1.347447  |
| 46 | 1 | 0 | -4.893821 | 2.848833  | 1.681769  |

|               |    |           |       |       |           |       |       |           |       |       |
|---------------|----|-----------|-------|-------|-----------|-------|-------|-----------|-------|-------|
| Frequencies — |    | 1667.6702 |       |       | 1690.3679 |       |       | 1767.8528 |       |       |
| Red. masses — |    | 9.9841    |       |       | 8.3376    |       |       | 10.9270   |       |       |
| Frc consts —  |    | 16.3599   |       |       | 14.0363   |       |       | 20.1208   |       |       |
| IR Inten —    |    | 983.2084  |       |       | 235.9609  |       |       | 415.9510  |       |       |
| Atom          | AN | X         | Y     | Z     | X         | Y     | Z     | X         | Y     | Z     |
| 1             | 7  | -0.06     | -0.12 | -0.04 | 0.02      | 0.06  | 0.01  | -0.01     | 0.00  | 0.00  |
| 2             | 6  | -0.02     | 0.03  | 0.00  | 0.01      | -0.01 | 0.00  | 0.02      | 0.01  | -0.06 |
| 3             | 6  | 0.01      | -0.01 | 0.00  | 0.00      | 0.01  | 0.00  | -0.01     | -0.01 | -0.01 |
| 4             | 6  | 0.00      | 0.01  | 0.00  | 0.00      | 0.00  | 0.00  | 0.00      | 0.00  | 0.00  |
| 5             | 6  | -0.02     | -0.02 | 0.00  | 0.01      | 0.01  | 0.00  | 0.00      | 0.00  | 0.00  |
| 6             | 6  | -0.15     | 0.30  | -0.08 | -0.24     | 0.54  | -0.14 | 0.00      | -0.01 | 0.00  |
| 7             | 8  | 0.06      | -0.17 | 0.05  | 0.10      | -0.29 | 0.08  | 0.00      | 0.00  | 0.00  |
| 8             | 8  | 0.00      | -0.03 | 0.01  | 0.01      | -0.05 | 0.02  | 0.00      | 0.00  | 0.00  |
| 9             | 6  | -0.01     | 0.02  | -0.01 | -0.03     | 0.03  | -0.01 | 0.00      | 0.00  | 0.00  |
| 10            | 6  | 0.00      | 0.00  | 0.00  | 0.00      | 0.00  | 0.00  | 0.00      | 0.00  | 0.00  |
| 11            | 6  | 0.00      | 0.00  | 0.00  | 0.00      | 0.00  | 0.00  | 0.00      | 0.00  | 0.00  |
| 12            | 6  | 0.00      | 0.00  | 0.00  | 0.01      | -0.01 | 0.00  | 0.00      | 0.00  | 0.00  |

|    |   |       |       |       |       |       |       |       |       |       |
|----|---|-------|-------|-------|-------|-------|-------|-------|-------|-------|
| 13 | 6 | 0.00  | 0.01  | -0.03 | 0.00  | -0.01 | 0.02  | 0.03  | -0.23 | 0.72  |
| 14 | 8 | 0.00  | -0.01 | 0.02  | 0.00  | 0.01  | -0.01 | -0.03 | 0.15  | -0.45 |
| 15 | 7 | 0.07  | -0.03 | 0.00  | 0.07  | -0.07 | 0.02  | 0.00  | 0.00  | 0.00  |
| 16 | 1 | -0.09 | -0.05 | 0.02  | 0.42  | 0.00  | 0.00  | -0.01 | 0.00  | 0.00  |
| 17 | 6 | -0.02 | -0.03 | -0.02 | 0.02  | 0.03  | 0.00  | 0.00  | 0.00  | 0.00  |
| 18 | 6 | -0.01 | -0.01 | 0.01  | -0.03 | 0.01  | -0.01 | 0.00  | 0.00  | 0.00  |
| 19 | 1 | 0.22  | -0.10 | 0.14  | -0.23 | 0.03  | -0.02 | 0.02  | -0.01 | 0.01  |
| 20 | 8 | 0.00  | 0.01  | 0.00  | 0.00  | 0.00  | 0.00  | 0.00  | 0.00  | 0.00  |
| 21 | 6 | 0.08  | 0.64  | 0.06  | -0.04 | -0.31 | -0.02 | 0.01  | 0.04  | 0.00  |
| 22 | 8 | 0.00  | -0.37 | -0.02 | 0.00  | 0.17  | 0.01  | 0.00  | -0.02 | 0.00  |
| 23 | 8 | 0.00  | -0.01 | 0.00  | 0.00  | 0.00  | 0.00  | -0.01 | 0.02  | -0.04 |
| 24 | 6 | 0.00  | 0.00  | 0.00  | 0.00  | 0.00  | 0.00  | -0.02 | 0.01  | 0.03  |
| 25 | 1 | 0.10  | 0.01  | 0.00  | -0.05 | -0.01 | 0.00  | 0.10  | -0.15 | -0.19 |
| 26 | 1 | 0.02  | 0.06  | 0.03  | -0.01 | -0.03 | -0.02 | -0.01 | 0.00  | 0.02  |
| 27 | 1 | 0.00  | 0.00  | 0.00  | 0.00  | 0.00  | 0.00  | 0.05  | 0.06  | 0.00  |
| 28 | 1 | 0.00  | 0.00  | 0.00  | 0.00  | 0.00  | 0.00  | 0.01  | 0.02  | 0.02  |
| 29 | 1 | 0.03  | 0.00  | 0.00  | -0.01 | 0.00  | 0.00  | 0.00  | 0.03  | -0.03 |
| 30 | 1 | 0.00  | 0.14  | 0.09  | 0.01  | -0.06 | -0.04 | -0.01 | 0.02  | 0.02  |
| 31 | 1 | 0.03  | 0.23  | -0.06 | -0.01 | -0.10 | 0.03  | 0.00  | 0.02  | -0.01 |
| 32 | 1 | 0.00  | -0.06 | 0.03  | 0.00  | -0.10 | 0.06  | 0.00  | 0.00  | 0.00  |
| 33 | 1 | -0.02 | 0.00  | -0.01 | -0.03 | 0.00  | -0.02 | 0.00  | 0.00  | 0.00  |
| 34 | 1 | 0.07  | 0.00  | 0.04  | 0.10  | 0.00  | 0.06  | 0.00  | 0.00  | 0.00  |
| 35 | 1 | 0.00  | -0.07 | 0.01  | 0.00  | -0.11 | 0.01  | 0.00  | 0.00  | 0.00  |
| 36 | 1 | 0.07  | -0.03 | -0.03 | 0.10  | -0.04 | -0.05 | 0.00  | 0.00  | 0.00  |
| 37 | 1 | -0.02 | 0.01  | 0.01  | -0.03 | 0.01  | 0.01  | 0.00  | 0.00  | 0.00  |
| 38 | 1 | 0.00  | -0.01 | 0.00  | 0.01  | -0.02 | 0.00  | 0.00  | 0.00  | 0.00  |
| 39 | 1 | 0.00  | -0.01 | 0.01  | 0.01  | -0.01 | 0.01  | 0.00  | 0.00  | 0.00  |
| 40 | 1 | 0.00  | 0.03  | -0.01 | 0.00  | 0.06  | -0.02 | 0.00  | 0.00  | 0.00  |
| 41 | 1 | 0.03  | 0.02  | -0.04 | 0.06  | -0.03 | 0.01  | 0.00  | 0.00  | 0.00  |
| 42 | 1 | -0.01 | -0.02 | 0.00  | 0.00  | -0.05 | 0.04  | 0.00  | 0.01  | 0.00  |
| 43 | 1 | 0.09  | -0.14 | 0.06  | 0.15  | -0.20 | 0.08  | 0.00  | 0.00  | 0.00  |
| 44 | 1 | 0.00  | 0.00  | 0.01  | 0.00  | 0.00  | 0.00  | 0.10  | -0.06 | -0.20 |
| 45 | 1 | -0.01 | 0.00  | 0.00  | 0.00  | 0.00  | 0.00  | 0.06  | -0.13 | -0.04 |
| 46 | 1 | 0.00  | 0.00  | 0.00  | 0.00  | 0.00  | 0.00  | 0.13  | -0.08 | -0.02 |

**Table S13.** <sup>13</sup>C NMR chemical shifts of carbonyl carbons in **1a**, **1b**, **2**, and **3a**

| Solvent                             | E <sub>T</sub> <sup>N</sup> | <b>1a</b> |        | <b>1b</b> |        | <b>2</b> |        | <b>3a</b>                  |                            |
|-------------------------------------|-----------------------------|-----------|--------|-----------|--------|----------|--------|----------------------------|----------------------------|
|                                     |                             | COOH      | COOtBu | COOMe     | COOtBu | COOH     | COOtBu | COOH                       | COOtBu                     |
| THF (no-D)                          | 0.207                       | 173.2     | 154.4  | 173.7     | 154.9  | 173.7    | 156.5  | 173.6 (172.9) <sup>1</sup> | 152.9 (153.6) <sup>1</sup> |
| CDCl <sub>3</sub>                   | 0.259                       | 176.9     | 155.6  | 174.2     | 155.4  | 176.0    | 155.9  | 174.1                      | 156.9                      |
| Acetone- <i>d</i> <sub>6</sub>      | 0.355                       | 174.5     | 156.1  | 174.8     | 156.7  | 174.1    | 157.1  | 175.1 (174.5) <sup>1</sup> | 154.7 (154.3) <sup>1</sup> |
| DMSO- <i>d</i> <sub>6</sub>         | 0.444                       | 174.7     | 155.3  | 173.6     | 155.3  | 173.5    | 155.8  | 174.4 (174.0) <sup>1</sup> | 153.1 (153.5) <sup>1</sup> |
| Acetonitrile- <i>d</i> <sub>3</sub> | 0.460                       | 174.8     | 156.5  | 174.7     | 156.3  | 173.7    | 154.9  | 174.7 (174.1) <sup>1</sup> | 156.0 (154.5) <sup>1</sup> |
| Ethanol (no-D)                      | 0.654                       | 175.6     | 156.0  | 174.3     | 156.4  | 175.5    | 157.7  | 175.9 (175.6) <sup>1</sup> | 155.9 (155.2) <sup>1</sup> |
| Methanol- <i>d</i> <sub>4</sub>     | 0.762                       | 177.7     | 158.7  | 176.3     | 158.7  | 176.5    | 159.1  | 177.6                      | 156.8                      |
| D <sub>2</sub> O                    | 1.000                       | 178.2     | 158.0  | ————      | ————   | 177.0    | 158.4  | 178.7                      | 156.2                      |

1. Chemical shift in parentheses is minor amide rotational isomer.

**Table S14.** <sup>13</sup>C NMR chemical shifts of carbonyl carbons in **3b**, **4a**, **4b**, and **5**

| Solvent                             | E <sub>T</sub> <sup>N</sup> | <b>3b</b>                  |                            | <b>4a</b> |                     | <b>4b</b> |                     | <b>5</b> |                     |
|-------------------------------------|-----------------------------|----------------------------|----------------------------|-----------|---------------------|-----------|---------------------|----------|---------------------|
|                                     |                             | COOMe                      | COO <sup>t</sup> Bu        | COOH      | COO <sup>t</sup> Bu | COOMe     | COO <sup>t</sup> Bu | COOH     | COO <sup>t</sup> Bu |
| THF (no-D)                          | 0.207                       | 173.2 (172.7) <sup>1</sup> | 153.0 (153.7) <sup>1</sup> | 172.6     | 156.4               | 170.9     | 155.1               | 171.7    | 155.6               |
| CDCl <sub>3</sub>                   | 0.259                       | 173.8                      | 154.4                      | 173.5     | 156.5               | 171.2     | 155.7               | 173.8    | 156.8               |
| Acetone- <i>d</i> <sub>6</sub>      | 0.355                       | 174.7 (174.3) <sup>1</sup> | 154.5                      | 172.9     | 156.5               | 172.6     | 156.8               | 173.2    | 157.3               |
| DMSO- <i>d</i> <sub>6</sub>         | 0.444                       | 173.3 (173.0) <sup>1</sup> | 152.9                      | 172.4     | 155.3               | 171.5     | 155.3               | 172.5    | 155.7               |
| Acetonitrile- <i>d</i> <sub>3</sub> | 0.460                       | 174.7 (174.4) <sup>1</sup> | 154.4 (153.4) <sup>1</sup> | 172.5     | 156.6               | 172.3     | 156.5               | 172.7    | 156.7               |
| Ethanol (no-D)                      | 0.654                       | 173.7 (173.4) <sup>1</sup> | 153.9 (154.4) <sup>1</sup> | 174.3     | 156.4               | 171.1     | 155.8               | 174.4    | 157.8               |
| Methanol- <i>d</i> <sub>4</sub>     | 0.762                       | 176.2 (175.9) <sup>1</sup> | 156.6 (157.1) <sup>1</sup> | 174.9     | 158.7               | 173.8     | 158.7               | 174.5    | 158.3               |
| D <sub>2</sub> O                    | 1.000                       | ————                       | ————                       | 175.0     | 158.3               | ————      | ————                | 175.2    | 158.4               |

1. Chemical shift in parentheses is minor amide rotational isomer.



**Table S15.** <sup>13</sup>C NMR chemical shifts of carbonyl carbons in **6** and **7**

| Solvent                             | E <sub>T</sub> <sup>N</sup> | <b>6</b>                   |                            |                            | <b>7</b> |                            |                            |
|-------------------------------------|-----------------------------|----------------------------|----------------------------|----------------------------|----------|----------------------------|----------------------------|
|                                     |                             | COOMe                      | CONH                       | COO <sup>t</sup> Bu        | COOMe    | CONH                       | COO <sup>t</sup> Bu        |
| THF (no-D)                          | 0.207                       | 173.1                      | 172.1 (171.7) <sup>1</sup> | 155.6 (154.6) <sup>1</sup> | 170.9    | 172.4 (171.9) <sup>1</sup> | 154.6 (153.7) <sup>1</sup> |
| CDCl <sub>3</sub>                   | 0.259                       | 173.1                      | 171.7 (172.1) <sup>1</sup> | 155.6 (154.6) <sup>1</sup> | 170.8    | 172.6 (173.2) <sup>1</sup> | 155.2 (154.6) <sup>1</sup> |
| Acetone- <i>d</i> <sub>6</sub>      | 0.355                       | 174.3                      | 173.7 (173.1) <sup>1</sup> | 155.1 (156.0) <sup>1</sup> | 172.1    | 174.0 (173.5) <sup>1</sup> | 155.2 (156.0) <sup>1</sup> |
| DMSO- <i>d</i> <sub>6</sub>         | 0.444                       | 173.0 (173.1) <sup>1</sup> | 172.4 (172.2) <sup>1</sup> | 153.3 (153.5) <sup>1</sup> | 171.1    | 172.7 (172.4) <sup>1</sup> | 153.4 (153.6) <sup>1</sup> |
| Acetonitrile- <i>d</i> <sub>3</sub> | 0.460                       | 174.0                      | 173.6 (173.2) <sup>1</sup> | 154.9 (156.0) <sup>1</sup> | 171.8    | 174.0 (173.6) <sup>1</sup> | 155.0 (155.8) <sup>1</sup> |
| Ethanol (no-D)                      | 0.654                       | 173.8                      | 173.0 (173.3) <sup>1</sup> | 154.3 (154.6) <sup>1</sup> | 170.7    | 174.1 (173.6) <sup>1</sup> | 154.6 (154.8)              |
| Methanol- <i>d</i> <sub>4</sub>     | 0.762                       | 175.6 (175.2) <sup>1</sup> | 174.4 (174.7) <sup>1</sup> | 156.0 (156.3) <sup>1</sup> | 172.1    | 175.8 (175.4) <sup>1</sup> | 156.1 (156.4)              |

1. Chemical shift in parentheses is minor amide rotational isomer.

**Table S16.**  $^{13}\text{C}$  NMR chemical shifts of carbonyl carbons in **8** and **9**

| Solvent             | $E_{\text{T}}^{\text{N}}$ | <b>8</b>                   |                            |                            | <b>9</b> |       |        |
|---------------------|---------------------------|----------------------------|----------------------------|----------------------------|----------|-------|--------|
|                     |                           | COOMe                      | CON                        | COOtBu                     | COOMe    | CON   | COOtBu |
| THF (no-D)          | 0.207                     | 171.0                      | 154.9 (153.4) <sup>1</sup> | 153.7 (153.0) <sup>1</sup> | 171.9    | 170.7 | 154.8  |
| $\text{CDCl}_3$     | 0.259                     | 171.5 (171.0) <sup>1</sup> | 154.9 (154.3) <sup>1</sup> | 154.1 (153.7) <sup>1</sup> | 172.4    | 171.7 | 155.2  |
| Acetone- $d_6$      | 0.355                     | 172.0                      | 155.7 (154.2) <sup>1</sup> | 154.5 (154.1) <sup>1</sup> | 173.1    | 172.0 | 155.8  |
| DMSO- $d_6$         | 0.444                     | 170.4                      | 153.0 (153.2) <sup>1</sup> | 152.8 (152.9) <sup>1</sup> | 172.4    | 171.3 | 155.1  |
| Acetonitrile- $d_3$ | 0.460                     | 172.4                      | 155.9 (154.6) <sup>1</sup> | 154.8 (154.3) <sup>1</sup> | 173.6    | 172.5 | 156.1  |
| Ethanol (no-D)      | 0.654                     | 171.0                      | 154.7 (154.1) <sup>1</sup> | 153.8 (153.3) <sup>1</sup> | 172.9    | 172.5 | 156.0  |
| Methanol- $d_4$     | 0.762                     | 172.9                      | 156.4 (155.8) <sup>1</sup> | 155.3 (154.9) <sup>1</sup> | 174.2    | 174.1 | 157.7  |

1. Chemical shift in parentheses is minor amide rotational isomer.

**Table S17.**  $^{13}\text{C}$  NMR chemical shifts of carbonyl carbons in **10**

| Solvent             | $E_{\text{T}}^{\text{N}}$ | <b>10</b>                  |       |                            |
|---------------------|---------------------------|----------------------------|-------|----------------------------|
|                     |                           | COOMe                      | CON   | COOtBu                     |
| THF (no-D)          | 0.207                     | 172.3                      | 169.6 | 155.3                      |
| $\text{CDCl}_3$     | 0.259                     | 172.6 (172.1) <sup>1</sup> | 169.9 | 155.4 (157.0) <sup>1</sup> |
| Acetone- $d_6$      | 0.355                     | 173.5                      | 170.3 | 156.3                      |
| DMSO- $d_6$         | 0.444                     | 172.4                      | 169.2 | 155.4 (156.7) <sup>1</sup> |
| Acetonitrile- $d_3$ | 0.460                     | 173.9                      | 170.5 | 156.5                      |
| Ethanol (no-D)      | 0.654                     | 172.4                      | 170.1 | 156.0 (158.0) <sup>1</sup> |
| Methanol- $d_4$     | 0.762                     | 174.2                      | 171.9 | 157.9                      |

1. Chemical shift in parentheses is minor amide rotational isomer.
